1 **Inferring *Mycobacterium bovis* transmission between cattle and badgers using**  
2 **isolates from the Randomised Badger Culling Trial**

3

4 Andries J. van Tonder<sup>1,\*</sup>, Mark Thornton<sup>1</sup>, Andrew J.K. Conlan<sup>1</sup>, Keith A. Jolley<sup>2</sup>, Lee  
5 Goolding<sup>3</sup>, Andrew P. Mitchell<sup>3</sup>, James Dale<sup>3</sup>, Eleftheria Palkopoulou<sup>3</sup>, Philip J.  
6 Hogarth<sup>3</sup>, R. Glyn Hewinson<sup>4</sup>, James L.N. Wood<sup>1</sup>, Julian Parkhill<sup>1</sup>

7

8 <sup>1</sup>Department of Veterinary Medicine, University of Cambridge, Cambridge, United  
9 Kingdom

10 <sup>2</sup>Department of Zoology, University of Oxford, Oxford, United Kingdom

11 <sup>3</sup>Animal and Plant Health Agency, New Haw, United Kingdom

12 <sup>4</sup>IBERS, Aberystwyth University, Ceredigion, United Kingdom

13

14 \*Corresponding author (ajv37@cam.ac.uk)

15

16 **Abstract**

17 *Mycobacterium bovis* (*M. bovis*) is a causative agent of bovine tuberculosis, a  
18 significant source of morbidity and mortality in the global cattle industry. The  
19 Randomised Badger Culling Trial was a field experiment carried out between 1998  
20 and 2005 in the South West of England. As part of this trial, *M. bovis* isolates were  
21 collected from contemporaneous and overlapping populations of badgers and cattle  
22 within ten defined trial areas. We combined whole genome sequences from 1,442  
23 isolates with location and cattle movement data, identifying transmission clusters and  
24 inferred rates and routes of transmission of *M. bovis*. Most trial areas contained a

25 single transmission cluster that had been established shortly before sampling, often  
26 contemporaneous with the expansion of bovine tuberculosis in the 1980s. The  
27 estimated rate of transmission from badger to cattle was approximately two times  
28 higher than from cattle to badger, and the rate of within-species transmission  
29 considerably exceeded these for both species. We identified long distance  
30 transmission events linked to cattle movement, recurrence of herd breakdown by  
31 infection within the same transmission clusters and superspreader events driven by  
32 cattle but not badgers. Overall, our data suggests that the transmission clusters in  
33 different parts of South West England that are still evident today were established by  
34 long-distance seeding events involving cattle movement, not by recrudescence from  
35 a long-established wildlife reservoir. Clusters are maintained primarily by within-  
36 species transmission, with less frequent spill-over both from badger to cattle and  
37 cattle to badger.

38

## 39 **Introduction**

40 *Mycobacterium bovis* (*M. bovis*), a member of the *Mycobacterium tuberculosis*  
41 complex (MTBC) and a pathogen with zoonotic potential [1], is the main causative  
42 agent of bovine tuberculosis (bTB), a significant source of morbidity and mortality in  
43 the global cattle industry. In the United Kingdom (UK), the estimated annual cost of  
44 managing this disease is £120 million [2].

45

46 *M. bovis* has a broad host range with different wildlife reservoirs depending on  
47 geographic location: in Britain and Ireland the Eurasian badger is the predominant  
48 wildlife host, in France wild boar and deer, and in New Zealand the introduced brush-

49 tail possum [3-5]. The presence of wildlife reservoirs makes the control and potential  
50 elimination of bTB challenging even in countries such as the UK with extensive cattle  
51 test and slaughter strategies, and movement restrictions imposed on herds with new  
52 bTB incidents termed breakdowns [6].

53

54 The Randomised Badger Culling Trial (RBCT) was a large-scale ecological field  
55 experiment carried out between 1998 and 2005 with the aim of quantifying the impact  
56 of culling badgers on the incidence of bTB breakdowns in nearby cattle herds [7]. Ten  
57 trial areas within the southwest of England and English Midlands, each of  
58 approximately 100 km<sup>2</sup>, were selected on the basis of high bTB incidence. Each trial  
59 area was divided into triplets of randomly allocated interventions: proactive culling  
60 (widespread and repeated culling across the trial areas), reactive culling (badgers  
61 culled if breakdowns detected in nearby herds) and control or survey-only areas (no  
62 badger culling). Approximately 9,000 badgers were culled and sampled in proactive  
63 areas between 1998 and 2005 though culling was suspended between May 2001 and  
64 January 2002 due to a national foot and mouth disease epidemic.

65

66 A number of previous studies have established epidemiological links between  
67 badgers and nearby cattle although extent of transmission between the two host  
68 species remains uncertain [8, 9]. More recent analyses making use of whole genome  
69 sequencing (WGS), which offers much higher resolution for strain characterisation  
70 and tracking transmission, have confirmed the close genetic relatedness of *M. bovis*  
71 isolates from sympatric cattle and badger populations but, due to the low genomic  
72 variability of the *M. bovis* genome and a lack of balanced sampling between the

73 different host species, have not been able to adequately address the direction of  
74 transmission [10, 11]. The first direct estimate of the extent and directionality of  
75 transmission between cattle and badgers suggested that transmission was up to ten  
76 times higher from badgers to cattle than *vice versa* [9]. Subsequent studies have  
77 estimated that cattle to badger transmission was at least three times or an order of  
78 magnitude higher than badger to cattle transmission [12, 13]. However, these results  
79 may not be applicable to the wider *M. bovis* population in different regions of the UK,  
80 often being based on small, geographically narrow datasets chosen for the presence  
81 of the same strain type (spoligotype SB0263). Those in Northern Ireland may  
82 additionally reflect the lower density of badgers compared to Southern England and  
83 the outbreak in Cumbria was an outbreak in a region with low incidence of bTB.

84

85 This Eradication of bovine tuberculosis (ERADbTB) project was set up with the aim of  
86 using WGS data obtained from *M. bovis* isolates collected as part of the RBCT to  
87 characterise the population structure of the bacterium within the trial areas, attempt  
88 to quantify levels and directionality of *M. bovis* transmission between cattle and  
89 badgers and track the longer-term persistence of genetic lineages of the bacterium.  
90 Approximately 2,000 *M. bovis* isolates available from the RBCT were selected for  
91 sequencing with the final dataset consisting of 1,442 genomes (690 from badgers  
92 and 750 from cattle found to be infected in proactive cull trial areas respectively).

93

## 94 **Methods**

### 95 *Sample selection, culturing and sequencing*

96 A total of 2,137 *M. bovis* isolates from cattle (n = 1,011) and badgers (n = 1,126)  
97 collected from proactive trial areas were selected for culturing, of which 1,838 isolates  
98 were located in the frozen archives maintained by the Animal and Plant Health Agency  
99 (APHA). Isolates were re-cultured and grown for up to six weeks or until sufficient  
100 growth was observed (n = 1,651). Isolates were heat killed in hot blocks at 80°C for  
101 30 minutes. An adapted library construction protocol using an increased number of  
102 sixteen PCR cycles was used to generate Illumina libraries which were then  
103 sequenced at the Wellcome Sanger Institute using the Illumina HiSeq X10 platform  
104 to generate 2 x 150 bp paired-end reads. Metadata for the sequenced isolates is  
105 available on pubMLST (<https://pubmlst.org/projects/mbovis-eradbtb>) [14, 15]. A map  
106 of the geographical locations of isolate collection (latitude and longitude) was  
107 constructed using the R v 3.5.1 [16] library ggmap [17].

108

### 109 *Sequence QC*

110 FastQC v0.11.9 [18] was used to generate basic quality control metrics for the raw  
111 sequence data. Sequencing reads were prefiltered using Kraken v0.10.6 [19] against  
112 a database containing all RefSeq bacterial and archeal nucleotide sequences to  
113 identify reads with similarity to *Mycobacterium* species. Further sequence matching  
114 was done on the Kraken results using Bracken v1.0 [20]. Samples with < 70% reads  
115 mapping to a *Mycobacterium* species were excluded from further analyses (n = 183).

116

117

118 *In silico genotyping*

119 SpoTyping v2.0 [21] was used to extract the binary representation of spoligotype  
120 patterns from the sequence reads and the *M. bovis* spoligotype database  
121 (<https://www.mbovis.org/database.php>) was used to assign SB numbers. Novel  
122 spoligotype patterns were submitted to the database to generate new SB numbers.  
123 Clonal complexes were assigned to samples using RD-analyzer v1.0 [22] with  
124 samples not identified as belonging to previously described clonal complexes (Eu1,  
125 Eu2, Af1, Af2) designated as “Other” [23-26]. Further assignment of isolates marked  
126 as “Other” to clonal complex was based on the phylogenetic lineages recently  
127 identified by Loiseau *et al.* [27].

128

129 *Mapping and phylogenetics*

130 Sequence reads were mapped to the *Mycobacterium bovis* AF2122/97 reference  
131 genome (NC0002945) using BWA mem v0.7.17 (minimum and maximum insert sizes  
132 of 50 and 1000 respectively) [28]. Single nucleotide polymorphisms (SNPs) were  
133 called using SAMtools v1.2 mpileup and BCFtools v1.2 (minimum base call quality of  
134 50 and minimum root squared mapping quality of 30) as previously described [29].  
135 Samples with reads mapping to less than 90% of the AF2122/97 reference were  
136 excluded (n = 26). Genomic regions consisting of GC-rich sequences such as PPE  
137 proteins and repeats were masked in the resulting alignment using previously  
138 published coordinates [30] and variant sites in the subsequent masked alignment  
139 were extracted using snp-sites v 2.5.1 [31]. Maximum likelihood phylogenetic trees  
140 were constructed using IQ-tree v1.6.5 accounting for constant sites (-fconst;  
141 determined using snp-sites -C) with the built-in model testing (-m MFP) to determine

142 the best phylogenetic model (GTR+F+R2) and 1000 ultrafast bootstraps (-bb 1000)  
143 [32]. Pairwise SNP distances were calculated for all pairs of isolates from the SNP  
144 alignment using pairsnp v1.0 (<https://github.com/gtonkinhill/pairsnp>).

145

146 To provide a global context for the isolates sequenced in this study, a published  
147 clonal complex Eu1 dataset (n = 2,842; Supplementary File 2) spanning fourteen  
148 countries was assembled [9, 10, 30, 33-47]. Sequence data was downloaded from  
149 the European Nucleotide Archive (ENA) and trimmed using Trimmomatic v0.33 [48].  
150 Sample QC, spoligotype assignment, mapping and phylogenetic tree construction  
151 were performed as above. The tree was rooted with a *Mycobacterium caprae* isolate  
152 (SRR7617662).

153

#### 154 *Transmission Clusters*

155 The R library iGRAPH [49] was used to define putative transmission clusters using a  
156 pairwise SNP distance between any two samples of 15 as the threshold. This  
157 threshold was chosen as it would allow for the possible identification of older  
158 transmission events but also allow for any variance in the rates of mutation amongst  
159 the sampled isolates, and has been previously used in a similar analysis of a human  
160 *Mycobacterium tuberculosis* dataset [50]. Large clusters were manually divided  
161 further on the basis of clear divisions within these clusters observed in the  
162 phylogenetic tree (Clusters 5/6 and Clusters 8-12). Transmission clusters with fewer  
163 than 50 isolates were not analysed further leaving twelve transmission clusters for  
164 further analyses. New alignments were generated for each cluster as described  
165 above.

166 The presence of a temporal signal in each transmission cluster was investigated by  
167 plotting the root to tip distance for each isolate, calculated using the R library phytools  
168 [51], against its sampling date (Supplementary Figure 1). The slope, x-intercept (most  
169 recent common ancestor; MRCA), correlation coefficient and  $R^2$  value were  
170 calculated for each dataset in R. BEAST v1.8.4 [52] was run on each SNP alignment,  
171 using tip sampling dates for calibration. Three runs of  $10^8$  Markov chain Monte Carlo  
172 (MCMC) iterations were performed using a HKY substitution model, strict or constant  
173 molecular clock and constant or exponential population size and growth (12 separate  
174 runs) for each transmission cluster. The performance of each model was assessed  
175 through the comparison of posterior marginal likelihood estimates [53, 54] and the  
176 model with the highest Bayes factor [55] (strict clock/constant population size) was  
177 selected for each transmission cluster (Supplementary Table 1). The three selected  
178 MCMC runs were combined using LogCombiner v1.8.4 (10% burnin) and  
179 convergence was assessed (posterior effective sample size (ESS) > 200 for each  
180 parameter). A maximum clade credibility tree summarizing the posterior sample of  
181 trees in the combined MCMC runs was produced using TreeAnnotator v1.8.4. To  
182 confirm the temporal signal in each tree generated, the R library TIPDATINGBEAST  
183 [56] was used to resample tip dates from each alignment to generate 20 new datasets  
184 with randomly assigned dates. BEAST was then run on each new dataset using the  
185 same strict clock priors (Supplementary Figure 2). If the estimated substitution rates  
186 in the observed data did not overlap with the estimated substitution rates in the  
187 randomized data then the temporal signal observed in the observed data was  
188 considered not to be obtained by chance.

189



190 Transmission reconstruction was performed on each cluster using the R library  
191 TransPhylo [57] which allows for unsampled cases and within-host diversity. The  
192 same parameters (gamma shape = 1.6; scale = 3.5) were used for the infection and  
193 generation time prior distribution. The TransPhylo algorithm was run three times for  
194  $10^7$  MCMC iterations sampling every 200,000 states and a burnin of 10% on each  
195 cluster using the MCC trees generated previously. The R library coda [58] was used  
196 to assess convergence (Gelman and Rubin's Convergence Diagnostic  $< 1.05$ ) and  
197 ESS values  $> 100$  for within-host diversity, reproductive rate and sampling proportion  
198 (Supplementary Table 2). Post processing of each TransPhylo run was performed in  
199 R.

200

201 The BEAST2 [59] package BASTA (Bayesian Structured coalescent Approximation)  
202 [60] was used to estimate transmission rates between badgers and cattle, defined as  
203 demes, in each transmission cluster. A strict clock/equal population size model was  
204 used and the BASTA analysis was repeated three times and run for  $3 \times 10^8$  MCMC  
205 iterations with 10% burnin. Convergence was assessed as above. Post processing  
206 of the BASTA analysis was performed in R.

207

208 SNP-scaled phylogenetic trees were calculated for each transmission cluster using  
209 pyjar (<https://github.com/simonrharris/pyjar>) [61] and plotted using the R libraries  
210 treeio and ggtree [62, 63].

211

212

213

## 214 *Cattle Movements*

215 bTB metadata was extracted from APHA's Sam database which records all statutory  
216 bTB testing information. Cattle movement metadata was extracted from APHA's  
217 copy of the Department of Environment, Food and Rural Affairs' (DEFRA)'s Cattle  
218 Tracing System (CTS). Movement data were extracted for 727/752 cattle where the  
219 ear tag could be matched to the Sam database (it only became a legal requirement  
220 to record cattle movement in the CTS after January 2001 so movement data may be  
221 missing for the early part of the RBCT). Movements of TB test reactor cattle that were  
222 not subjected to laboratory culture and/or sequencing of *M. bovis*, but may have  
223 contributed to the spread of infection, were extracted from the CTS using the  
224 following criteria: the animals passed through the same location as an animal with a  
225 sequenced isolate, the animals were born before 2009 and the animals were  
226 classified as "reactors". Animals were classified as reactors if they had a positive  
227 tuberculin test result, had an inconclusive test result but were slaughtered and culture  
228 positive for *M. bovis*, were culture positive for *M. bovis* following detection by routine  
229 meat inspection at a slaughterhouse, or were culture-negative reactors that led to a  
230 breakdown with other tuberculin test positive animals. UK grid coordinates were  
231 extracted from the Sam database by matching to location IDs. Past breakdown  
232 history was extracted by matching herds using county-parish-holding (CPH)  
233 numbers. Where multiple herds had the same CPH number, the active dates of the  
234 herds were checked and the individual animal test records were used to identify the  
235 correct entries. Short stay locations and locations with missing coordinates were  
236 excluded by creating animal records that removed missing locations or stays of fewer  
237 than eight days. Where subsequent movements occurred, these were connected to

238 the previous movements to create a continuous record. Where the cattle ear tag IDs  
239 of sequenced isolates could not be matched to the database, the CPH was used to  
240 identify the final location and coordinates for plotting. The final herd of the animals  
241 with sequenced isolates was determined as the location closest to death where the  
242 length of stay was at least seven days. The data was queried and extracted from the  
243 CTS using PostgreSQL. Pairwise geographic distances between each isolate in  
244 kilometres were calculated using the `distHaversine` function from the R library  
245 `geosphere` [64]. Herd and badger locations were randomly shifted by up to 1 km in  
246 the horizontal and vertical planes for plotting using the R libraries `maps` and `mapdata`  
247 [65].

248

## 249 **Results**

### 250 *Population structure*

251 A total of 1,442 *M. bovis* isolates from badgers (n = 690) and cattle (n = 752) were  
252 sequenced and passed QC; the sites of collection for all 1,442 isolates are shown in  
253 Figure 1A. The average number of sequenced isolates per trial area was 144 (range:  
254 81-233) and the ratio of cattle to badger isolates varied from 0.22 (trial area D3) to  
255 4.38 (trial area B2; Table 1). All sequenced isolates were collected between 1999 and  
256 2010. The majority (1437/1442; 99.7%) of the isolates were clonal complex Eu1  
257 whilst the remaining five isolates (all SB0134) belonged to an as yet undefined clonal  
258 complex (labelled Unknown7 in Loiseau et al. [27]; Figure 1B).

259

260 Over 60 unique spoligotypes were identified with the most prevalent being SB0140  
261 (n = 531), SB0263 (n = 491), SB0129 (n = 147), SB0274 (n = 85), SB0957 (n = 34) and

262 Table 1: Breakdown of the 1,442 sequenced *Mycobacterium bovis* isolates by trial area and  
263 host. The table is ordered by total number of isolates from high to low.

| <b>Trial area</b> | <b>Date range</b> | <b>Cattle (n)</b> | <b>Badgers (n)</b> | <b>Total</b> |
|-------------------|-------------------|-------------------|--------------------|--------------|
| <b>D3</b>         | 2002-2010         | 42                | 191                | 233          |
| <b>I2</b>         | 2002-2007         | 74                | 93                 | 167          |
| <b>G2</b>         | 2000-2006         | 118               | 45                 | 163          |
| <b>A3</b>         | 2000-2007         | 97                | 62                 | 159          |
| <b>B2</b>         | 1999-2007         | 127               | 29                 | 156          |
| <b>C3</b>         | 1999-2006         | 94                | 56                 | 150          |
| <b>E3</b>         | 2000-2007         | 54                | 75                 | 129          |
| <b>J1</b>         | 2002-2008         | 65                | 54                 | 119          |
| <b>F1</b>         | 2000-2005         | 31                | 54                 | 85           |
| <b>H2</b>         | 2000-2006         | 50                | 31                 | 81           |
| <b>Total</b>      | <b>1999-2010</b>  | <b>752</b>        | <b>690</b>         | <b>1442</b>  |

264

265 SB0145 (n = 32). With the exception of SB0140 and SB0263, which were found in  
266 multiple trial areas, the geographical distributions of the most prevalent spoligotypes  
267 were largely confined to a single trial area (Figure 1C). Examination of the pairwise  
268 SNP distances of isolates within the above spoligotypes showed that there were  
269 considerable differences in diversity amongst the spoligotypes (Figure 1D). High  
270 levels of diversity were observed in spoligotypes SB0140 and SB0129 reflecting the  
271 phylogenetic structure of the isolates with these spoligotypes. Figure 1E shows  
272 pairwise SNP distances for all isolates plotted against geographic distance for each  
273 of the most prevalent spoligotypes.

274

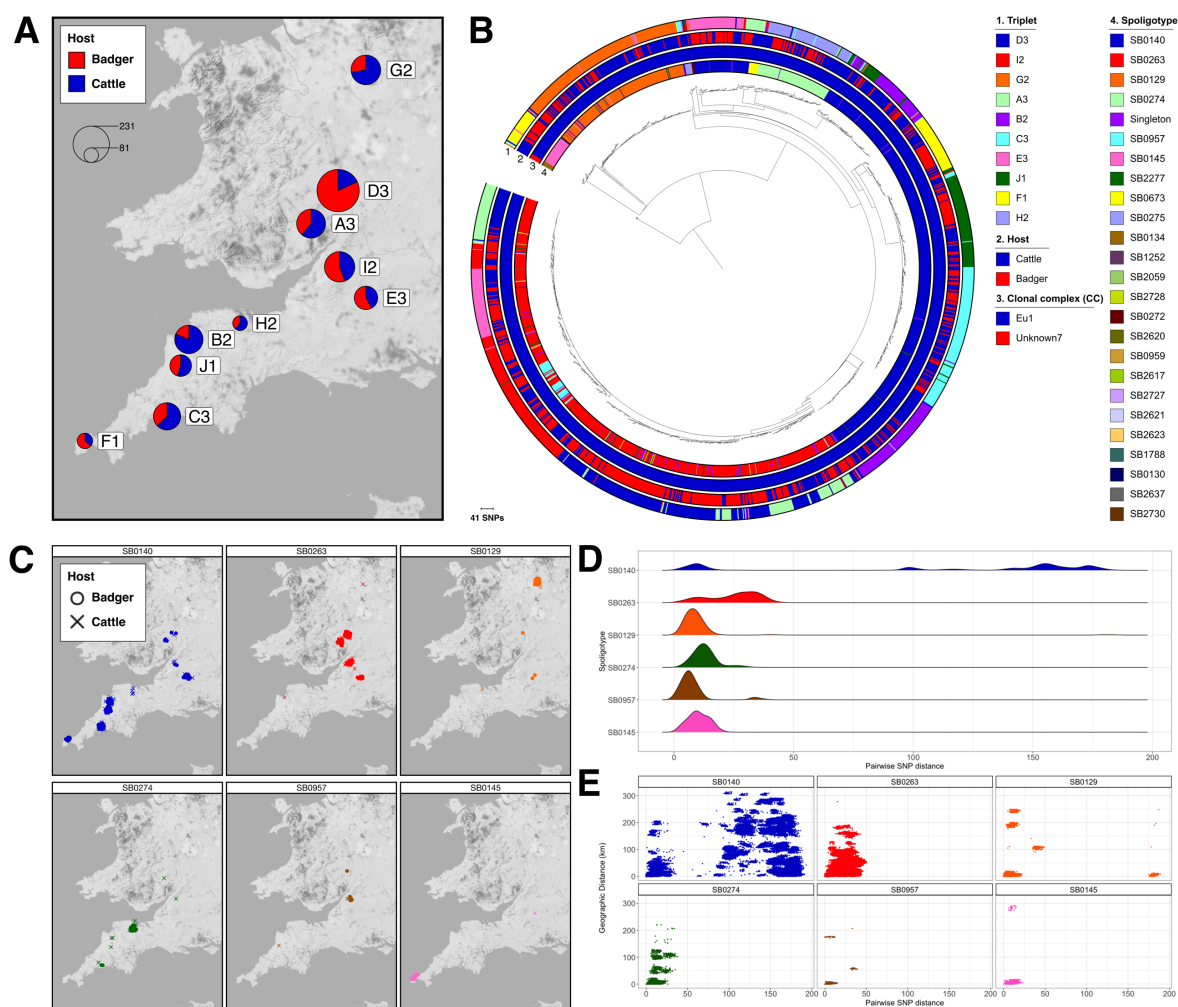

275

276 **Figure 1. Genomic epidemiology of Randomised Badger Culling Trial (RBCT) dataset:**

277 A) Map showing location of isolation for 1,442 sequenced *Mycobacterium bovis* isolates.

278 Isolates collected from badgers and cattle are shown in red and blue respectively. The

279 proportion of samples from each host is shown in the pie charts and the pie charts are scaled

280 according to number of isolates. The RBCT triplet where each of the isolates were collected

281 is labelled; B) Maximum likelihood phylogenetic tree of 1,442 *M. bovis* isolates rooted with

282 isolates from the Unknown7 clonal complex. Trial area, host, clonal complex and spoligotype

283 are shown as datastrips around the outside of the phylogenetic tree; C) Geographical

284 distributions of the six most prevalent spoligotypes in the dataset. The host of each isolate

285 is represented by a different shape: circle for badger and cross for cattle; D) Frequency

286 distributions of pairwise SNP distances between all isolates belonging to the six most

287 prevalent spoligotypes; E) Scatterplots of pairwise SNP distance against geographic distance  
288 in kilometres for all pairs of isolates belonging to the six most prevalent spoligotypes.

289

## 290 *Transmission*

### 291 *Transmission clusters*

292 A total of twelve putative transmission clusters, containing 1224/1442 (84.9%) of the  
293 isolates, were defined using a conservative threshold of 15 SNPs. The clusters varied  
294 in size between 54 (Cluster 2) and 193 (Cluster 9) isolates (Table 2). The ratio of cattle  
295 to badger isolates in each transmission cluster varied from 0.15 (Cluster 9) to 5.44  
296 (Cluster 12; Table 2). The phylogenetic tree of all 1,442 isolates with the transmission  
297 clusters overlaid on it is shown in Figure 2A and the geographical distribution of each  
298 transmission cluster is shown in Figure 2B. The geographical distribution of the  
299 transmission clusters was strongly associated with trial area, with the majority of  
300 isolates from a transmission cluster found in the same trial area (Figure 2B).

301

302 A multimodal distribution was observed for pairwise SNP distances of isolates  
303 assigned to each of the transmission clusters (Supplementary Figure 3). The first  
304 mode comprised pairwise differences of 400 - 500 SNPs and was made up of  
305 comparisons of isolates from Eu1 clades deeper in the phylogeny, and the second  
306 and third modes between 100-200 SNPs were comprised of isolates from more  
307 closely related clades. The final modes between 0 and 50 SNPs were made up of  
308 comparisons of isolates from the same clade and here the within and between  
309 transmission cluster comparisons overlapped, although there was a clear peak below  
310 15 SNPs representing the transmission clusters themselves. There were no  
311 observable differences between the distributions when the host of each isolate in a

312 pairwise comparison was considered i.e. there were no host-specific patterns of  
313 genetic relatedness.

314

315 Table 2: Breakdown of the 12 putative transmission clusters by host. The table is ordered by  
316 total number of isolates from high to low.

| <b>Cluster</b>    | <b>Badgers (n)</b> | <b>Cattle (n)</b> | <b>Total</b> |
|-------------------|--------------------|-------------------|--------------|
| <b>Cluster 9</b>  | 168                | 25                | 193          |
| <b>Cluster 1</b>  | 46                 | 115               | 161          |
| <b>Cluster 6</b>  | 53                 | 86                | 139          |
| <b>Cluster 8</b>  | 61                 | 49                | 110          |
| <b>Cluster 5</b>  | 50                 | 47                | 97           |
| <b>Cluster 7</b>  | 16                 | 76                | 92           |
| <b>Cluster 10</b> | 41                 | 46                | 87           |
| <b>Cluster 4</b>  | 19                 | 67                | 86           |
| <b>Cluster 3</b>  | 34                 | 49                | 83           |
| <b>Cluster 11</b> | 30                 | 34                | 64           |
| <b>Cluster 12</b> | 9                  | 49                | 58           |
| <b>Cluster 2</b>  | 38                 | 16                | 54           |
| <b>Total</b>      | <b>565</b>         | <b>659</b>        | <b>1224</b>  |

317

318

### 319 *Temporal analyses of transmission clusters*

320 To describe the temporal dynamics of the transmission clusters, each cluster was  
321 independently tested for evidence of temporal signal. Comparison of root to tip  
322 distances with sampling dates did not find significant correlations for any of the  
323 transmission clusters (Supplementary Figure 2). However, dated tip randomisation  
324 (DTR) analyses, where evidence of a temporal signal is shown by a lack of overlap  
325 between the estimated substitution rates of the observed data and the randomised

326 datasets, showed that there was no overlap between the highest posterior densities  
327 (HPD) of the real and randomised datasets for 5/12 of the transmission clusters  
328 (Supplementary Figure 3). In a further 5/12 there were overlaps between the HPDs  
329 but not medians of the real dataset and one or more of the randomised datasets. For  
330 the final two clusters (Cluster 2 and Cluster 4), the median substitution rates of one  
331 and five randomised datasets respectively overlapped that of the real datasets  
332 (Supplementary Figure 3).

333

334 The median substitution rate of each transmission cluster varied between 0.51  
335 (Cluster 12) and 6.0 (Cluster 3) substitutions per genome per year (Supplementary  
336 Table 3). Phylogenetic dating analysis using BEAST showed that the estimated date  
337 of the MRCA of each transmission cluster varied between 1985 (Cluster 2; 95%  
338 confidence interval [CI]: 1977 to 1993) and 1997 (Cluster 5; 95% CI: 1994 to 2000;  
339 Figure 2C). The median difference between the MRCA and the date of collection of  
340 the first sample was 8.1 (range 4.0 – 15.0) years.

341

#### 342 *Transmission analysis with TransPhylo*

343 TransPhylo was used to estimate the number of unsampled cases. The median  
344 number of sampled cases per transmission cluster was 89.5 (range: 54 - 193)  
345 compared to a median of 130.1 (range: 41 - 203) inferred unsampled cases  
346 suggesting a median case finding rate of 43.2% (range: 28.3% - 74.2%;  
347 Supplementary Figure 4). The median inferred time from infection to sampling across  
348 all transmission clusters was 0.56 years (95% CI: 0.07 – 2.26 years) for cattle and  
349 0.96 years (95% CI: 0.25 – 3.36 years) for badgers (Figure 2D).



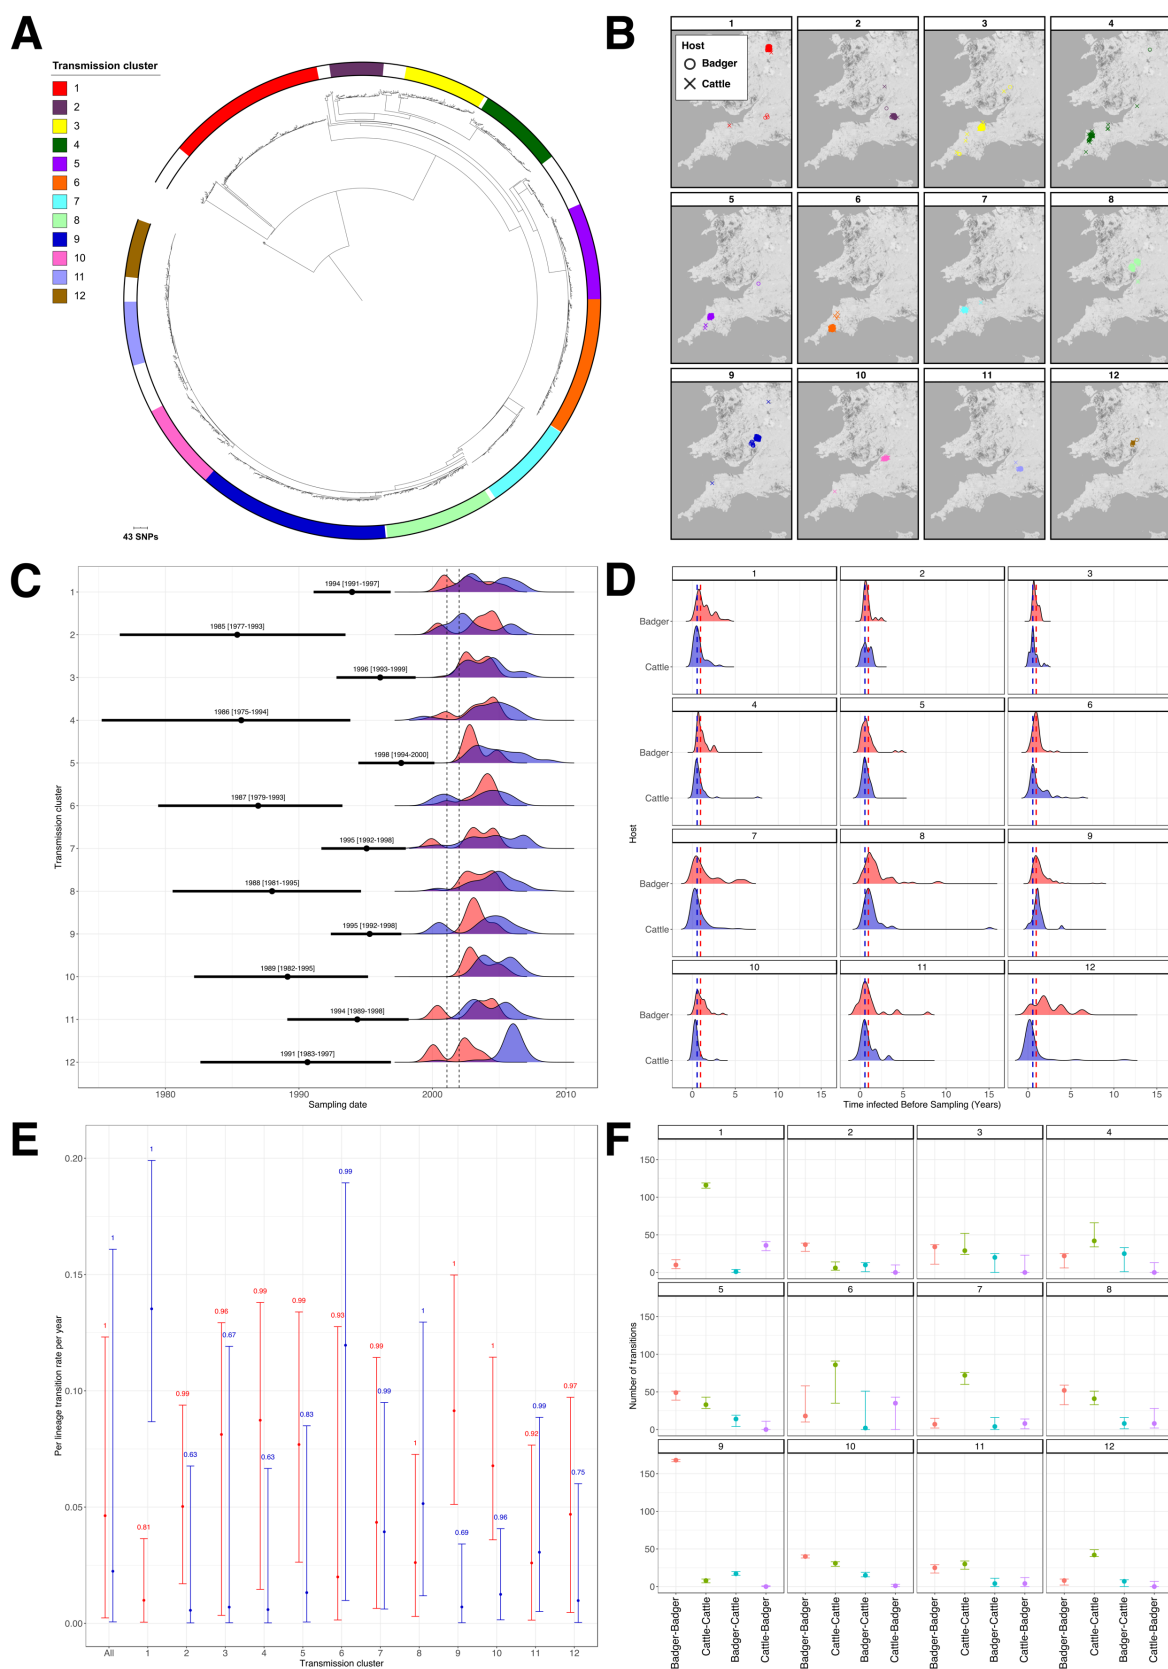

350

351 **Figure 2: Transmission in the Randomised Badger Culling Trial (RBCT) dataset: A)**

352 Maximum likelihood phylogenetic tree of 1,442 isolates with the twelve putative transmission

353 clusters annotated; B) Geographical distributions of the twelve putative transmission clusters.  
354 The host of each isolate is represented by a different shape: circle for badger and cross for  
355 cattle; C) Molecular dating of transmission clusters. The inferred median and 95% confidence  
356 intervals of the MRCA for each transmission cluster is shown in black. The dates of collection  
357 of samples within each transmission cluster are shown as frequency distributions and  
358 coloured according to host (red for badgers and blue for cattle). The time period of the  
359 suspension of badger culling due to FMD is represented by dashed lines; D) Median length  
360 of time of infection for all isolates before sampling per transmission cluster. The medians of  
361 all isolates are shown by red and blue dashed lines for cattle and badgers respectively; E)  
362 Estimated inter-species transmission rates for each transmission cluster. The vertical lines  
363 show the lower and upper (2.5% and 97.5%) bounds of the transmission rate distribution for  
364 each transmission cluster. The values above the vertical lines represent the posterior  
365 probability of each rate and the distributions are coloured according to direction of  
366 transmission (red for badger-to-cattle and blue for cattle-to-badger transmission); F) Number  
367 of transmissions between known and estimated species counted on each phylogenetic tree  
368 in the posterior distribution for each transmission cluster. The vertical lines show the lower  
369 and upper (2.5% and 97.5%) bounds of the distributions. The distributions are coloured  
370 according to the type of transmission (red for badger-badger, green for cattle-cattle, blue for  
371 badger-cattle and purple for cattle-badger).

372

373 A total of 84 highly supported transmission pairs (posterior probability of transmission  
374 between isolate 1 and isolate 2 > 0.5) were identified within the twelve transmission  
375 clusters (Table 3) using TransPhylo. The majority of these transmissions (60/84) were  
376 within-species whilst 24/84 were between species. No highly supported transmission  
377 pairs were identified in Cluster 3. The median pairwise SNP distances for the highly  
378 supported transmission pairs across all transmission clusters were 1 (range: 0-8), 1

379 (range: 0-5) and 1 (range: 0-6) for cattle to cattle, badger to badger and between-  
380 species transmission respectively.

381

### 382 *Directionality of transmission between host species*

383 BASTA was used to determine the dominant direction of transmission between host  
384 species and found higher rates of transmission from badgers to cattle in 8/12  
385 transmission clusters and from cattle to badgers in 4/12 clusters (the confidence  
386 intervals for each direction overlapped in all clusters except clusters 1 and 9; Figure  
387 2E). For the networks with higher badger to cattle transmission, this direction of  
388 infection occurred between 1.1 (Cluster 7) and 14.8 (Cluster 4) times more frequently  
389 than in the opposite direction. By comparison, in the four networks with higher cattle  
390 to badger transmission, the frequency was between 1.2 (Cluster 11) and 13.6 (Cluster  
391 1) times higher than in the opposite direction. The overall median badger to cattle  
392 transmission rate for all transmission clusters was 2.1 (95% CI: 0.8-3.8) times higher  
393 than the cattle to badger transmission rate.

394

395 As BASTA does not directly calculate the transmission rate within-species, the lower  
396 bound of the number of transmissions (the count of transitions in the posterior trees)  
397 between different animals, regardless of host, was also calculated for each  
398 transmission cluster (Figure 2F). For each of the clusters, the estimated number of  
399 transmission events is consistent with the estimated inter-species transmission rates.  
400 Across the twelve clusters, the number of within-species transmission events was  
401 higher than the between-species transmissions with the average number of cattle to

402 cattle transmission events 4.9 (range 0-31) times greater than the number of cattle to  
 403 badger transmission events and 17 (range 0.5-116) times greater than the number of  
 404  
 405 Table 3: Highly supported transmission pairs within each transmission cluster. For each  
 406 transmission cluster, the number of intra- and inter-species transmission pairs with a  
 407 probability > 0.5 is listed. The median SNP distance for each set of transmission pairs is  
 408 given in parentheses.

| <b>Transmission cluster</b> | <b>Number highly supported transmission pairs</b> | <b>Number Cattle-Cattle transmission pairs (median SNP distance)</b> | <b>Number Badger-Badger transmission pairs (median SNP distance)</b> | <b>Number Between-species transmission pairs (median SNP distance)</b> |
|-----------------------------|---------------------------------------------------|----------------------------------------------------------------------|----------------------------------------------------------------------|------------------------------------------------------------------------|
| <b>Cluster 1</b>            | 9                                                 | 4 (2)                                                                | 1 (0)                                                                | 4 (1)                                                                  |
| <b>Cluster 2</b>            | 1                                                 | 0                                                                    | 0                                                                    | 1 (1)                                                                  |
| <b>Cluster 3</b>            | 0                                                 | 0                                                                    | 0                                                                    | 0                                                                      |
| <b>Cluster 4</b>            | 1                                                 | 1 (1)                                                                | 0                                                                    | 0                                                                      |
| <b>Cluster 5</b>            | 14                                                | 3 (1)                                                                | 7 (1)                                                                | 4 (1)                                                                  |
| <b>Cluster 6</b>            | 5                                                 | 4 (0.5)                                                              | 1 (2)                                                                | 0                                                                      |
| <b>Cluster 7</b>            | 15                                                | 11 (1)                                                               | 0                                                                    | 4 (1)                                                                  |
| <b>Cluster 8</b>            | 10                                                | 4 (1)                                                                | 3 (1)                                                                | 3 (1)                                                                  |
| <b>Cluster 9</b>            | 17                                                | 0                                                                    | 12 (0)                                                               | 5 (3)                                                                  |
| <b>Cluster 10</b>           | 2                                                 | 1 (1)                                                                | 1 (0)                                                                | 0                                                                      |
| <b>Cluster 11</b>           | 5                                                 | 3 (2)                                                                | 1 (2)                                                                | 1 (5)                                                                  |
| <b>Cluster 12</b>           | 5                                                 | 0                                                                    | 3 (7)                                                                | 2 (4)                                                                  |
| <b>Total</b>                | <b>84</b>                                         | <b>31</b>                                                            | <b>29</b>                                                            | <b>24</b>                                                              |

409

410 badger to cattle transmission events. The number of badger to badger transmission  
411 events was 4.7 (range 0.9-10) times higher than the number of badger to cattle  
412 transmission events and 4.5 (range 0-40) times higher than the number of cattle to  
413 badger transmission events.

414

#### 415 *Other Transmission dynamics*

416 Metadata from the SAM database was incorporated for each of the cattle within a  
417 transmission cluster that could be matched, which allowed examples of recurrence  
418 (detection of infections subsequent to previous outbreaks or breakdowns),  
419 superspreading (individual hosts that have a disproportionate effect on the spread of  
420 infection) and long-distance transmission (transmission between different trial areas)  
421 to be characterised.

422

#### 423 *Recurrence*

424 A total of 47 isolates formed a distinct clade within the Cluster 6 phylogeny (Figure  
425 3B). Of these, 25 were isolates from cattle slaughtered between February 2001 and  
426 October 2005 as part of three recorded breakdowns on the same farm comprising 35  
427 confirmed cases (Figure 3A). Based on the date of slaughter, these isolates were  
428 divided into six slaughter groups (Figure 3A). Two pairs of isolates from different  
429 animals (1 and 20; 6 and 23) and different slaughter groups (1 and 5) were 0 SNPs  
430 apart despite the subsequently infected animals (20 and 23) only moving to the farm  
431 a year after the first animals were slaughtered (Figure 3A). The subsequently infected  
432 animals were then slaughtered three years later as part of a later breakdown. The  
433 majority of the rest of the cattle isolates in this clade were also very similar despite

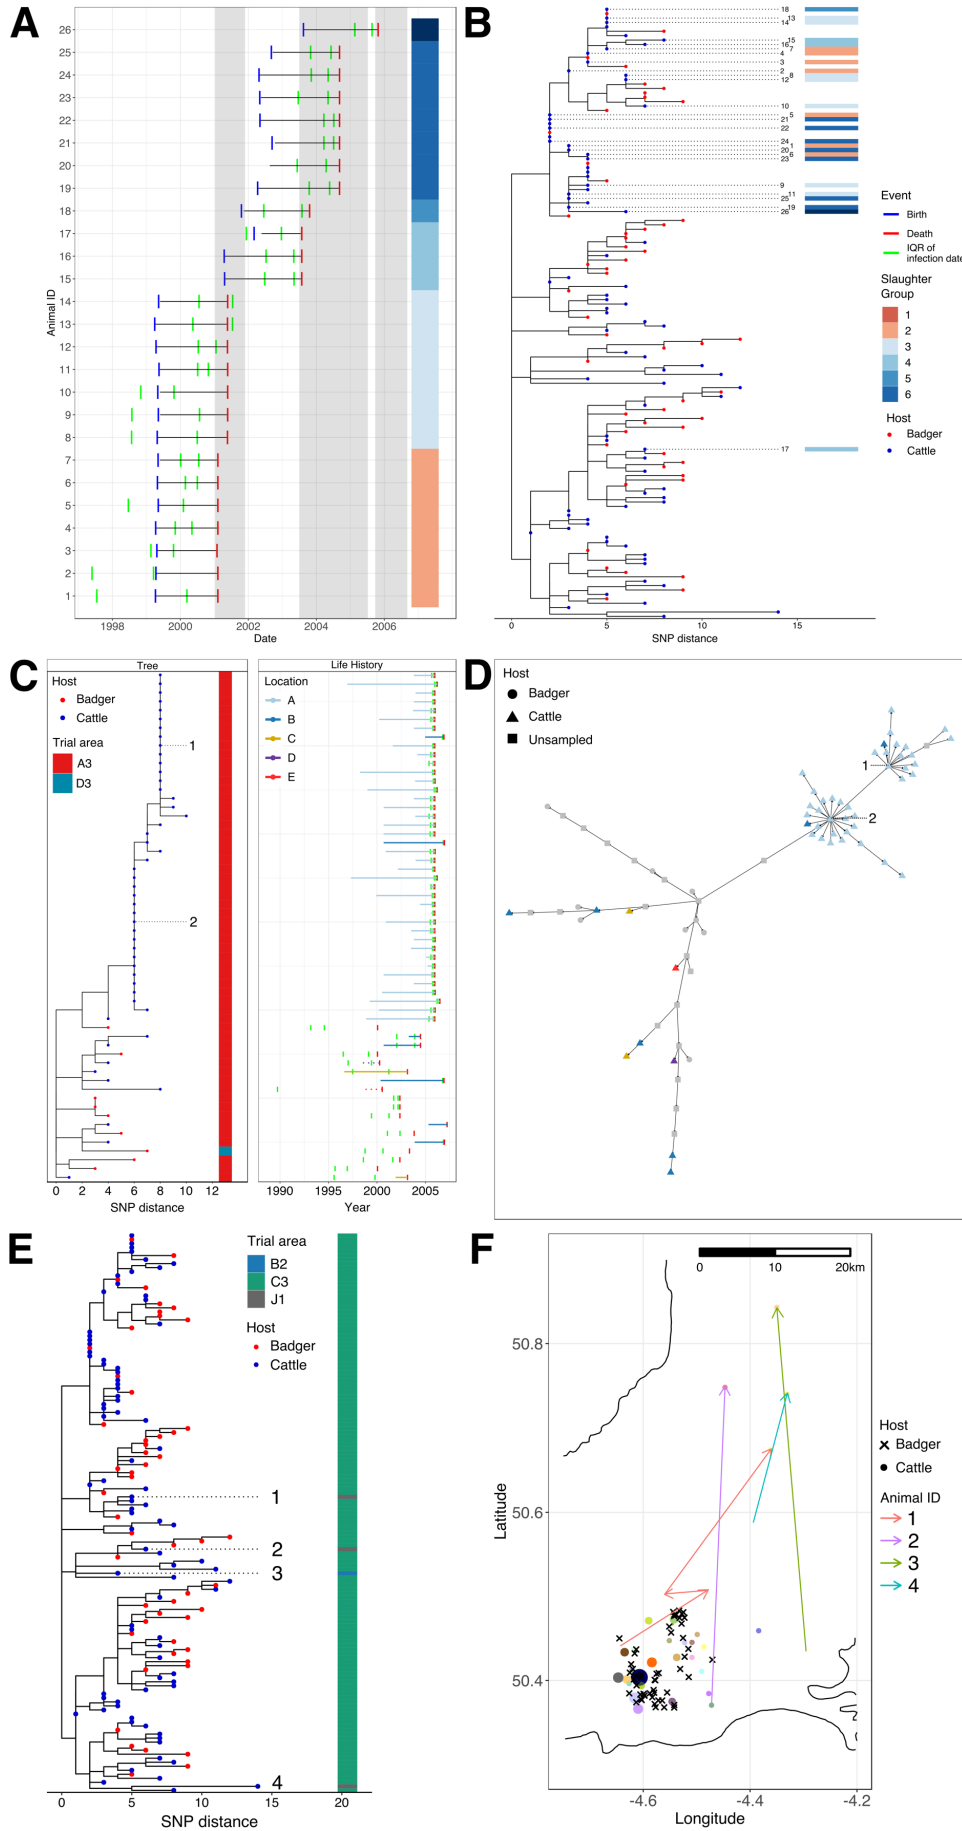

435 **Figure 3: Integration of genomics and cattle movement data:** A) Life histories of animals  
436 included in Cluster 6. Date of birth is shown in blue, date of death in red and the interquartile  
437 range (IQR) for the estimated date of infection is shown in green. The grey shading represents  
438 breakdowns and Slaughter Groups are labelled based on date of death; B) SNP-scaled  
439 phylogenetic subtree for Cluster 6. Tips are coloured according to host (red for badger and  
440 blue for cattle), relevant isolates are labelled and Slaughter Group is shown as a data strip;  
441 C) SNP-scaled phylogenetic tree for Cluster 12. Tips are coloured according to host (red for  
442 badger and blue for cattle), isolates inferred as superspreaders are labelled and Trial area is  
443 shown as a data strip. Life histories are shown for each isolate. Date of birth is shown in blue,  
444 date of death in red and the interquartile range for the estimated date of infection is shown  
445 in green. The farm location identifier of each cattle isolate is coloured according to the legend  
446 and the length of each bar reflects the length of time an animal spent at its final location; D)  
447 Transmission network for Cluster 12. The shape of each node is based on the host (circle  
448 for badger or triangle for cattle) or else a square for inferred unsampled cases. Nodes are  
449 coloured based on their location (grey for unsampled and badger isolates which don't have  
450 a farm location identifier). Isolates inferred as superspreaders are labelled; E) SNP-scaled  
451 phylogenetic tree for Cluster 6. Tips are coloured according to host (red for badger and blue  
452 for cattle), isolates highlighted as examples of long-distance transmission are labelled and  
453 the Trial area for each isolate is shown as a data strip; F) Map showing the location of isolation  
454 for each isolate in Cluster 6. The shape of each isolate is based on the host (cross for badger  
455 or circle for cattle), the colour of the cattle isolates is based on the farm location and the size  
456 of the cattle isolates reflects the number of animals in Cluster 6 at that location. The  
457 movements of the animals from which isolates highlighted as examples of long-distance  
458 transmission were collected are shown as arrows and coloured according to animal identifier.  
459 Herd and badger locations were randomly shifted by up to 1 km in the horizontal and vertical  
460 planes.  
461

462 the long time periods from when these animals arrived on the farm and when they  
463 were slaughtered. Cattle were still present on the farm between the different  
464 breakdowns suggesting that infection was being maintained locally, either in this or  
465 a neighbouring herd or else within the local badger population.

466

#### 467 *Superspreading*

468 The structure of the Cluster 12 phylogeny showed a number of cattle isolates  
469 clustering together within a very flat tree structure i.e. the majority of these isolates  
470 were 0 SNPs apart (Figure 3C). Of these, 38 isolates were from animals slaughtered  
471 at a single location (A) as part of a breakdown between April 2005 and July 2007 that  
472 identified 59 reactors from which 39 had *M. bovis* cultured. The resulting  
473 transmission network inferred two distinct superspreading events of 13 and 21 cases  
474 inferred to be centred around two animals (1 and 2; Figure 3D). Two of the animals  
475 in these superspreading events were from a different location (B) though this was only  
476 0.83 km away, suggesting potential epidemiological links between locations A and B.

477

#### 478 *Long-distance transmission*

479 Isolates from four cattle in Cluster 6 were not from the predominant trial area (C3) of  
480 this cluster (Figure 3E). For three of these isolates (1, 2 and 3), the inferred dates of  
481 infection showed that the animals, which had moved between farms, were likely  
482 infected at a location in or near trial area C3. For the remaining animal, 4, the inferred  
483 date of infection didn't overlap with a previous location in or near trial area C3 but the  
484 location data for 58 days of this animal's life is missing from the database. The



485 distances moved by the infected animals ranged between 23 and 46 km providing  
486 evidence of movement mediated transmission (Figure 3F).

487

## 488 **Discussion**

489 The RBCT was set up to assess the impact of badger culling on the incidence of bTB  
490 in nearby cattle herds. In this study, the resulting badger and cattle isolates have  
491 been sequenced, meaning that, for the first time, WGS of large numbers of *M. bovis*  
492 isolates from co-located populations of both species collected contemporaneously  
493 in well-defined geographical areas can be used to address key questions surrounding  
494 bTB transmission in the high-risk regions of England.

495

496 A total of 60 unique spoligotype patterns were identified in the dataset though the  
497 majority of the isolates (1320/1442; 91.5%) were made up of the six most prevalent  
498 spoligotypes confirming that there is relatively little genetic heterogeneity at this level  
499 amongst *M. bovis* in the high prevalence areas of England. The observed prevalence  
500 of spoligotypes in this study closely matched previously published data, generated  
501 using traditional typing methods, from the same time period [66], showing that the  
502 dataset accurately reflects the known population structure of *M. bovis* at that time.

503

504 Genotyping methods such as spoligotyping are used to infer close relationships  
505 between isolates (low genetic diversity) and assume monophyly. However, it is clear  
506 from plotting spoligotypes on the phylogenetic tree in Figure 1B, that some of the  
507 spoligotypes, in particular SB0140, are polyphyletic. Whilst the majority of SB0140  
508 isolates sit adjacent to each other in the phylogenetic tree, there is a single clade that

509 sits separately with the SB0274 and SB0673 clades falling between them. Another  
510 example is the intermingling of SB0957 and SB0263 isolates in trial area I2. An  
511 alternative way to view this data is to calculate and plot pairwise SNP distances for  
512 each of the most prevalent spoligotypes (Figure 1D). From this, we see that while  
513 there is a maximum of approximately 50 SNPs between members of four of the six  
514 most prevalent spoligotypes, for SB0140 and SB0129 the maximum pairwise SNP  
515 distance was between 150 and 200 SNPs, demonstrating higher levels of diversity  
516 for the *M. bovis* population as evidenced from genome-wide data compared to  
517 traditional typing data.

518

519 As we observed in our data, it has been recognised for a long time that spoligotypes  
520 can be homoplastic and identical spoligotype patterns can be found in  
521 phylogenetically unrelated strains [66]. Despite this, spoligotyping, along with  
522 Mycobacterial interspersed repetitive unit-variable number tandem repeat (MIRU-  
523 VNTR) analysis, has continued to be the most commonly applied method for  
524 genotyping *M. bovis* as it is cheap and comparatively straightforward to implement  
525 in the laboratory. However, given the much higher resolution offered by WGS and  
526 the fact that national bodies such as APHA and the United States Department of  
527 Agriculture (USDA) are now moving towards routinely sequencing all cases of  
528 *M.bovis*, it may now be time to move towards a SNP-based method of typing *M.*  
529 *bovis* isolates similar to the Coll method adopted for typing *M. tuberculosis sensu*  
530 *stricto* [67].

531

532 The predominance of clonal complex Eu1 in our dataset was unsurprising as previous  
533 work, including the study that first defined Eu1 [24], has shown that this clonal  
534 complex is ubiquitous in Great Britain, Northern Ireland and the Republic of Ireland  
535 whilst being uncommon in mainland Europe, where *M. bovis* genetic diversity is much  
536 greater [42]. Previous work using both PCR and genomics to assign clonal complex  
537 shows that Eu1 is likely the most predominant globally-circulating *M. bovis* lineage  
538 and it has been found in many countries that have historically traded cattle with the  
539 UK such as New Zealand, the USA, Mexico and Uruguay [33-35, 41]. The presence  
540 of this clonal complex and its spoligotypes such as SB0140 and SB0263 in these  
541 countries suggests that Eu1 has been present in the UK for at least 200 years or more.  
542 This is supported by the high level of pairwise SNP diversity observed within SB0140.

543

544 The Unknown7 isolates in the dataset were found in trial areas A3, D3 and G2 and  
545 were a maximum of 12 SNPs apart. The small number of isolates suggest that it is  
546 uncommon in the UK and the low level of genetic diversity suggests that it may be  
547 part of a single, recent introduction. This clonal complex has also been found in  
548 France, Mali and the USA [27, 33, 42] and given the geographical proximity of France  
549 and the ongoing trade of cattle between the two countries this may be the most likely  
550 origin for this lineage.

551

552 The prevailing hypothesis for the population history of *M. bovis*, in particular Eu1, in  
553 the UK is that there was a single introduction followed by long term endemicity and  
554 a population bottleneck due to effective control measures beginning in the 1930s [66].  
555 However, the observed phylogenetic structure of isolates when incorporated with a

556 global collection of Eu1 isolates, indicates that there have likely been multiple,  
557 perhaps as many as four, introductions of Eu1 into England (Supplementary Figure  
558 5). Whilst we did not attempt to date these introductions in this study, the availability  
559 of archived isolates from the 1980s along with contemporaneous isolates will be used  
560 alongside the RBCT dataset and other published UK datasets in future work to  
561 provide estimated dates for these introductions.

562

563 Due to the large size and clear phylogenetic and geographical structure of the dataset  
564 as well as our study aims, we defined transmission clusters using a conservative  
565 pairwise SNP threshold of 15 SNPs. There is currently no consensus as to what is  
566 the best threshold to apply to *Mycobacterium* genome datasets with previous studies  
567 using thresholds between three and fifteen SNPs [40, 50]. We chose the 15 SNP  
568 threshold as it would allow for the possible identification of older transmission events  
569 but also allow for any variance in the rates of mutation amongst the sampled isolates.  
570 We chose to use the software package TransPhylo as it integrates dates of isolate  
571 collection and genetic relatedness and allows for within-host diversity and unsampled  
572 cases. The first step of the analysis was to generate molecular dated phylogenies for  
573 each of the transmission clusters. Assessing the presence of temporal signal in a  
574 genome dataset is typically done in two ways: examining the linear relationship  
575 between root to tip distance and sampling date (under a perfect clocklike behaviour,  
576 then  $R^2 = 1$  [68]), and dated tip randomization (DTR) analysis. In DTR, the dates of  
577 sampling are repeatedly shuffled amongst the taxa and the clock rates between the  
578 observed and random data calculated and compared [69]. If there is no overlap  
579 between the estimated substitution rates of the observed data and the randomized

580 datasets then we can conclude that the observed dataset has a stronger temporal  
581 signal than expected by chance [69]. We obtained very low or negative values for  $R^2$   
582 for all our transmission clusters which is normally interpreted as evidence for a lack  
583 of temporal signal or else overdispersion in lineage-specific clock rates [70]  
584 (Supplementary Figure 2). The previously reported slow substitution rate of *M. bovis*  
585 [10, 34] and the short window of sampling (twelve years) may explain the lack of  
586 association between root to tip distances and sampling dates. As root to tip  
587 regression is only a tool for exploratory analysis [70] we performed DTR on all of the  
588 transmission clusters (Supplementary Figure 3). From this, we observed that there  
589 was strong evidence of temporal signal in 5/12 of the transmission clusters, moderate  
590 temporal signal in 5/12 transmission clusters and weak temporal signal in two  
591 clusters, particularly Cluster 2 (Supplementary Figure 2). Despite the especially weak  
592 evidence of temporal signal in Cluster 2, we decided to include it in our analyses as,  
593 given the close relatedness of all of the clusters, it is highly likely that the mutational  
594 process, and therefore the molecular clock, will be similar in each of them. As well  
595 as being used as input for TransPhylo molecular dating of each of the transmission  
596 clusters provided additional insights into the dataset.

597

598 Firstly, we were able to calculate substitution rates for each transmission cluster  
599 which ranged between 0.5 and 6 SNPs per genome per year (Supplementary Table  
600 3). Published estimates for the median substitution rate of *M. bovis* vary between  
601 0.15 and 0.53 substitutions per genome per year [10, 34]. Previous work has shown  
602 that there are lineage and study specific differences in the substitution rates within  
603 the *Mycobacterium tuberculosis* complex (MTBC) [71]. This analysis showed that

604 higher substitution rates were found in smaller datasets with narrow sample date  
605 ranges, which may explain the much higher substitution rates of up to six  
606 substitutions per genome per year we observed in our analyses. Secondly, we were  
607 able to infer the date of the MRCA of each transmission cluster (Figure 2C). The short  
608 time period (4 – 15 years) between the inferred date of the MRCAs and the earliest  
609 sample collection dates suggests that the transmission clusters are likely the result  
610 of recent seeding events and not a consequence of endemic disease in the form of  
611 long-term maintenance within herds or an endemic wildlife reservoir, in this case  
612 badgers. The introduction of a compulsory test and slaughter scheme in the UK in  
613 the 1950s saw a sustained decline in the annual number of infected animals removed  
614 as TB test reactors and infected cattle herds with only a few hundred reactors being  
615 detected annually in the early 1980s [66]. However, this decline was reversed from  
616 the late 1980s, with the UK now having one of the highest incidences of bTB in  
617 Europe. From our analyses, it is clear that the dates for the MRCA of each of the  
618 transmission clusters overlap with this population expansion.

619

620 From the TransPhylo analysis we were able to estimate what proportion of infected  
621 hosts we managed to sample for each transmission cluster (Supplementary Figure  
622 4). Sampling of all hosts infected with a disease is never complete due to a range of  
623 factors such as detection, failure to culture and in the case of genomics, issues  
624 related to sequence quality. In this study we estimate that we managed to sequence  
625 a median of 43.2% of cases across the transmission clusters though this varied from  
626 less than 30% to as high as 75% depending on the cluster. Obviously, the success  
627 of sampling has an impact on the types and quality of the inferences we are able to

628 make. For instance, we were able to confidently identify and confirm a  
629 superspreading event in Cluster 12 due to having sequenced 38/39 of the confirmed  
630 cases in a breakdown (see below).

631

632 The incubation period of TB in cattle is generally believed to be several months and  
633 potentially years, although there is some evidence of much shorter incubation periods  
634 in other mammalian species such as cats [72]. There is also typically a lag period  
635 (occult period) between infection and detection where infections are undetectable to  
636 the standard tuberculin test [73]. The organism may also persist for several years  
637 within infected animals before they are detected (latency) and reactivation has not  
638 been demonstrated in cattle. To date, there are no firm estimates for either the  
639 duration of the occult period or of epidemiological latency, which is problematic for  
640 fitting transmission models [74] and predicting the impact of control policies [75].  
641 Based on our analysis using TransPhylo, we can provide estimates for how long both  
642 badgers and cattle were infected before sampling. The analysis showed that, on  
643 average, badgers were infected for twice as long as cattle before sampling. The  
644 median period of infection for cattle of 0.56 years is consistent with the annual testing  
645 schedule imposed on cattle during the RBCT. Whilst there was a wide range of  
646 estimates for the length of infection the 95% confidence intervals for both badgers  
647 and cattle were within the normal lifespans of both species.

648

649 We were able to identify a small number of highly supported direct transmission  
650 events, defined as transmission pairs that had a posterior probability greater than 0.5  
651 (Table 3). Although the majority (60/84) of these transmission events occurred

652 between the same species, there were also 24 interspecies transmission pairs across  
653 the transmission clusters with pairwise SNP distances varying between 1 and 5  
654 SNPs. To date, there is limited evidence of badgers and cattle directly interacting  
655 and the majority of transmission is considered to be indirect i.e. through the  
656 environment [76]. Given the inferred number of unsampled cases and small number  
657 of highly supported transmission pairs, more intensive sampling would need to be  
658 performed to better establish transmission dynamics between the different bTB host  
659 species. Despite the logistical challenges around detecting and culturing *M. bovis* in  
660 environmental samples, the inclusion of samples from faeces and feed troughs and  
661 other potential hosts such as rodents and cervids should be an integral part of any  
662 future work.

663

664 One of the aims of this study was to assess and quantify the directionality of  
665 transmission between cattle and badgers. For this we used a Bayesian evolutionary  
666 tool, BASTA (Bayesian Structured coalescent Approximation), to estimate the  
667 interspecies transmission rates in each of the transmission clusters. BASTA was  
668 designed to estimate evolutionary dynamics in structured populations and account  
669 for sampling biases. For the majority of our transmission clusters, badger to cattle  
670 transmission occurred more frequently even in clusters with approximately equal  
671 numbers of cattle and badgers (Figure 2E). It is worth noting that the estimated  
672 transmission rates were very low with the median number of badger to cattle  
673 transmissions across all transmission clusters estimated as 0.05 transmissions per  
674 lineage per year and the median number of cattle to badger transmissions estimated  
675 as 0.02 transmissions per lineage per year (Figure 2E). Whilst BASTA does not



676 directly estimate intra-species transmission rates we could calculate the number of  
677 transmission events between each host species from the posterior log and tree files.  
678 These are conservative counts of the minimum number of transitions between  
679 sampled animals and their ancestors but do allow us to compare the number of inter-  
680 and intra-species transmissions. From this we were able to demonstrate that inter-  
681 species transmission occurs much less frequently than intra-species transmission in  
682 our transmission clusters and cattle to cattle transmission is more common than  
683 badger to badger transmission (Figure 2F). Three previous studies, each on small  
684 geographically localized populations, have used BASTA to estimate rates of  
685 transmission between badgers and cattle; the first estimated that badger to cattle  
686 transmission was 10.4 times more frequent than cattle to badger transmission, the  
687 second estimated that cattle to badger transmission was at least an order of  
688 magnitude higher than badger to cattle transmission and the third estimated that  
689 cattle to badger transmission was at least three times higher than badger to cattle  
690 transmission (a similar result was obtained using a similar transmission analysis  
691 package, MASCOT) [9, 12, 13]. These results, along with those described in this  
692 study, suggest that the directionality of transmission may vary between sampling area  
693 although badger to cattle transmission does appear to be more frequent. What is  
694 consistent across all the studies, however, is that intra-species transmission occurs  
695 much more frequently than inter-species transmission.

696

697 Beyond the original aims of the project such as characterising the population  
698 structure of *M. bovis* isolates collected as part of the RBCT and investigating  
699 interspecies transmission, the utility of WGS was also shown through its application

700 to other important aspects of bTB transmission in the UK. The combination of  
701 genomics and the extensive cattle tracing database allowed us to characterise  
702 examples of recurrence, superspreading and long-distance transmission within the  
703 dataset. Previous work has shown that prior history of bTB within a herd is an  
704 important predictor of breakdown: 38% of herds that clear movement restrictions  
705 experience another breakdown within 24 months [77]. This suggests that infection is  
706 being maintained within herds despite repeated testing and it is estimated that  
707 between 24% and 50% of recurrent breakdowns are due to persistence within the  
708 herd [74]. We were able to use pairwise genome comparisons to identify near  
709 identical isolates that were collected up to four years apart and which were part of  
710 confirmed herd breakdowns. Examination of the cattle movements confirmed that  
711 some of these isolates were collected from animals that arrived subsequent to the  
712 dates of slaughter of infected animals as part of previous breakdowns. The similarity  
713 of these more recent isolates to the earlier isolates would suggest that the animals  
714 were infected after their arrival in the new location and that control measures following  
715 the prior breakdowns were insufficiently effective.

716

717 TransPhylo allowed us to generate plausible transmission networks where star like  
718 nodes representative of potential superspreaders (individual hosts that have a  
719 disproportionate effect on the spread of infection) could be identified (Figure 3C/3D).  
720 We were then able to incorporate data from the CTS to identify the cattle likely acting  
721 as the source of the infections. Whilst previous work using modelling or network  
722 analysis has highlighted the importance of small numbers of farms or herds as hubs  
723 of transmission which act as superspreaders of infection [78, 79], we provide the first

724 evidence, based on genomics and cattle movement data, that particular animals  
725 within herds may also act as superspreaders potentially contributing to increased  
726 transmission between different locations if these animals are not identified before  
727 being moved. We were unable to identify any superspreaders amongst any of the  
728 sampled badgers.

729

730 From the temporal analysis of the transmission clusters we showed that these  
731 clusters are comparatively young and likely recently seeded. The most likely  
732 mechanism for this is the movement of infected cattle into a location followed by  
733 subsequent onward transmission within the herd and into the local badger  
734 populations. Given the median estimate of the MRCA of the transmission clusters  
735 was eight years before sampling began, this precluded any possibility of us sampling  
736 the index case for any of the transmission clusters. However, by incorporating cattle  
737 movement information with our transmission clusters, we were able to identify cattle  
738 infected with a particular lineage in one trial area moving to a trial area further away,  
739 highlighting the potential for long distance transmission events to seed new  
740 transmission clusters (Figure 3E/3F). This was also recently demonstrated by Rossi  
741 et al. who identified an imported infected animal or animals as being responsible for  
742 a bTB outbreak in a region of England with no previously known wildlife infections  
743 [12]. This has important implications for infection control; even with the limited  
744 sampling we conducted, the combination of genomics and cattle movements still  
745 allowed us to identify these potential seeding events. More targeted testing and  
746 sequencing before animals are moved, particularly to lower incidence areas, would

747 potentially identify these likely sources of infection before they are able to become  
748 established in other locations.

749

750 Potential limitations of our analysis were the choice and number of samples included  
751 in the study and known issues surrounding the lack of a strong temporal signal in *M.*  
752 *bovis* that may affect the results of any analyses based on molecular dating. Any  
753 sampling strategy we selected would not have been perfect; ideally, we would have  
754 tried to sequence all samples collected as part of the RBCT; however, this was not  
755 possible due to cost and manpower constraints so we chose to sequence only the  
756 badger and cattle isolates collected from proactive triplets excluding isolates from  
757 infected badgers culled in reactive triplets and infected cattle culled as part of  
758 contemporaneous breakdowns. From our TransPhylo analysis we estimated that we  
759 managed to sample approximately 40% of infected cases across our transmission  
760 clusters. Despite this, the size of the dataset was still large enough to generate  
761 several large transmission clusters that allowed us to draw robust conclusions about  
762 transmission, notably directionality of transmission between badgers and cattle.  
763 Comparison of the spoligotype distribution in our study to earlier work confirmed that  
764 our dataset was representative of the known population structure during the RBCT.

765

766 We know from previous work that the lack of a strong temporal signal is a potential  
767 issue when attempting to accurately date the origin of particular lineages [71]. The  
768 results of the dated tip randomization analysis indicated that there was moderate or  
769 strong temporal signal in nearly all of our transmission clusters; however, two of our  
770 transmission clusters notably Cluster 2 had a weak temporal signal. The range of

771 substitution rates we estimated for some of our transmission clusters was also higher  
772 than previously observed which may have affected the estimated dates of those  
773 transmission cluster's MRCAs. Overall, however, even if individual networks such as  
774 Cluster 2 with little or no temporal signal or Cluster 3 with a high substitution rate are  
775 of concern, the conclusions we have drawn are based on considering the results from  
776 twelve different transmission clusters composed of over 1,200 genomes and thus can  
777 be considered robust.

778

779 Multiple previous studies have shown that bTB transmission is complicated, unlikely  
780 to be driven by a single mechanism and is strongly associated with the setting and  
781 host dynamics of the system being studied. Here we used the largest single country  
782 genome dataset alongside the national cattle movement database to attempt to  
783 address key questions around bTB transmission in a multi-host, intensive setting.  
784 Whilst both the TransPhylo and BASTA results support inter-species transmission  
785 with some evidence that there is broadly more badger to cattle transmission than in  
786 the opposite direction, it is clear that the majority of ongoing transmission is occurring  
787 within cattle herds and within the badger populations. Spillover in either direction  
788 could then be considered to be occurring at a low level and, based on the dates of  
789 their MRCAs, the transmission clusters we defined are likely to have been the result  
790 of recent seeding events and are primarily being maintained by within-species  
791 transmission. We have also provided the first genomics-based estimates for the  
792 length of time that badgers and cattle are infected with bTB before sampling. Finally,  
793 we were able to characterise recurrence, superspreading and long-distance  
794 transmission within our transmission clusters.

795 **Data availability**

796 Raw sequencing reads were deposited at the European Nucleotide Archive  
797 (<https://www.ebi.ac.uk/ena/browser/home>) under project PRJEB19799; all  
798 accessions used in this project are listed in Supplementary File 1. Metadata for the  
799 sequenced isolates is available on pubMLST (<https://pubmlst.org/projects/mbovis-eradbtb>).  
800

801

802 **Code availability**

803 The R code used to perform data analyses in this study is available in GitHub  
804 (<https://github.com/avantonder/RBCT>).  
805

805

806 **Acknowledgements**

807 This work was supported by a joint Biotechnology and Biological Sciences Research  
808 Council (BBSRC) research grant under grant number BB/N00468X/1 and Department  
809 for Environment Food and Rural Affairs (Defra) research project SE3298. Glyn  
810 Hewinson holds a Sêr Cymru II Research Chair funded by the European Research  
811 Development Fund and Welsh Government. Thanks to Matt Mayho and Richard Ellis  
812 for providing advice on Illumina library construction, Mathew Beale for fruitful  
813 discussions and feedback regarding the ongoing analysis and manuscript and,  
814 Adrian Whatmore for coordinating Defra research project SE3298.  
815

815

816 **Author contributions**

817 A.J.K.C., R.G.H., J.L.N.W. and J.P. conceived the study. J.D. cultured, heat  
818 inactivated and submitted the *M. bovis* isolates for sequencing. L.G. and A.P.M.

819 extracted metadata for the study isolates from the CTS and Sam databases and  
820 uploaded this metadata to a BIGSdb database created by K.A.J. A.J.v.T. and M.T.  
821 performed the data analysis. A.J.v.T. coordinated the study and wrote the initial draft  
822 of the manuscript. A.J.v.T, A.J.K.C., E.P. P.J.H., J.L.N.W. and J.P. contributed to the  
823 final version of the manuscript. All authors read and approved the manuscript.

824

## 825 **Competing interests**

826 The authors declare no competing interests.

827

## 828 **References**

- 829 1. Olea-Popelka F, Muwonge A, Perera A, Dean AS, Mumford E, Erlacher-Vindel  
830 E, Forcella S, Silk BJ, Ditiu L, El Idrissi A, et al: **Zoonotic tuberculosis in**  
831 **human beings caused by *Mycobacterium bovis*-a call for action.** *Lancet*  
832 *Infectious Diseases* 2017, **17**:E21-E25.
- 833 2. Godfray HCJ, Donnelly C, Hewinson G, Winter M, Wood J: **Bovine TB**  
834 **strategy review.** 2018.
- 835 3. Muirhead RH, Gallagher J: **Tuberculosis in Wild Badgers in Gloucestershire**  
836 **- Epidemiology.** *Veterinary Record* 1974, **95**:552-555.
- 837 4. Hauer A, De Cruz K, Cochard T, Godreuil S, Karoui C, Henault S, Bulach T,  
838 Banuls AL, Biet F, Boschirolu ML: **Genetic Evolution of *Mycobacterium bovis***  
839 **Causing Tuberculosis in Livestock and Wildlife in France since 1978.** *Plos*  
840 *One* 2015, **10**.
- 841 5. Morris RS, Pfeiffer DU: **Directions and issues in bovine tuberculosis**  
842 **epidemiology and control in New Zealand.** *New Zealand Veterinary Journal*  
843 1995, **43**:256-265.
- 844 6. Godfray HCJ, Donnelly CA, Kao RR, Macdonald W, McDonald RA,  
845 Petrokofsky G, Wood JLN, Woodroffe R, Young DB, McLean AR: **A**  
846 **restatement of the natural science evidence base relevant to the control**

- 847           **of bovine tuberculosis in Great Britain. *Proceedings of the Royal Society B-***  
848           *Biological Sciences* 2013, **280**.
- 849 7.        Bourne J: *Bovine TB: the scientific evidence: a science base for a sustainable*  
850           *policy to control TB in cattle: an epidemiological investigation into bovine*  
851           *tuberculosis*. Department for Environment, Food and Rural Affairs; 2007.
- 852 8.        Woodroffe R, Donnelly CA, Johnston WT, Bourne FJ, Cheeseman CL, Clifton-  
853           Hadley RS, Cox DR, Gettinby G, Hewinson RG, Le Fevre AM, et al: **Spatial**  
854           **association of *Mycobacterium bovis* infection in cattle and badgers *Meles***  
855           ***meles*. *Journal of Applied Ecology* 2005, **42**:852-862.**
- 856 9.        Crispell J, Benton CH, Balaz D, De Maio N, Ahkmetova A, Allen A, Biek R,  
857           Presho EL, Dale J, Hewinson G, et al: **Combining genomics and**  
858           **epidemiology to analyse bi-directional transmission of *Mycobacterium***  
859           ***bovis* in a multi-host system. *Elife* 2019, **8**.**
- 860 10.       Biek R, O'Hare A, Wright D, Mallon T, McCormick C, Orton RJ, McDowell S,  
861           Trewby H, Skuce RA, Kao RR: **Whole Genome Sequencing Reveals Local**  
862           **Transmission Patterns of *Mycobacterium bovis* in Sympatric Cattle and**  
863           **Badger Populations. *Plos Pathogens* 2012, **8**.**
- 864 11.       Ahlstrom C, Barkema HW, Stevenson K, Zadoks RN, Biek R, Kao R, Trewby  
865           H, Haupstein D, Kelton DF, Fecteau G, et al: **Limitations of variable number**  
866           **of tandem repeat typing identified through whole genome sequencing of**  
867           ***Mycobacterium avium* subsp. *paratuberculosis* on a national and herd**  
868           **level. *BMC Genomics* 2015, **16**:161.**
- 869 12.       Rossi G, Crispell J, Brough T, Lycett SJ, White PCL, Allen A, Ellis RJ, Gordon  
870           SV, Harwood R, Palkopoulou E, et al: **Phylogenetic analysis of an emergent**  
871           ***Mycobacterium bovis* outbreak in an area with no previously known**  
872           **wildlife infections. *bioRxiv* 2020:2020.2011.2012.379297.**
- 873 13.       Akhmetova A, Guerrero J, McAdam P, Salvador LCM, Crispell J, Lavery J,  
874           Presho E, Kao RR, Biek R, Menzies F, et al: **Genomic epidemiology of**  
875           ***Mycobacterium bovis* infection in sympatric badger and cattle**  
876           **populations in Northern Ireland. *bioRxiv* 2021:2021.2003.2012.435101.**



- 877 14. Jolley KA, Bray JE, Maiden MC: **Open-access bacterial population**  
878 **genomics: BIGSdb software, the PubMLST. org website and their**  
879 **applications.** *Wellcome open research* 2018, **3**.
- 880 15. Jolley KA, Maiden MCJ: **BIGSdb: Scalable analysis of bacterial genome**  
881 **variation at the population level.** *Bmc Bioinformatics* 2010, **11**.
- 882 16. Team RC: **R: A language and environment for statistical computing.**  
883 Vienna, Austria; 2013.
- 884 17. Kahle D, Wickham H: **ggmap: Spatial Visualization with ggplot2.** *R Journal*  
885 2013, **5**:144-161.
- 886 18. Andrews S: **FastQC: a quality control tool for high throughput sequence**  
887 **data.** Babraham Bioinformatics, Babraham Institute, Cambridge, United  
888 Kingdom; 2010.
- 889 19. Wood DE, Lu J, Langmead B: **Improved metagenomic analysis with Kraken**  
890 **2.** *Genome Biology* 2019, **20**.
- 891 20. Lu J, Breitwieser FP, Thielen P, Salzberg SL: **Bracken: estimating species**  
892 **abundance in metagenomics data.** *Peerj Computer Science* 2017.
- 893 21. Xia E, Teo YY, Ong RTH: **SpoTyping: fast and accurate in silico**  
894 **Mycobacterium spoligotyping from sequence reads.** *Genome Medicine*  
895 2016, **8**.
- 896 22. Faksri K, Xia E, Tan JH, Teo YY, Ong RTH: **In silico region of difference (RD)**  
897 **analysis of *Mycobacterium tuberculosis* complex from sequence reads**  
898 **using RD-Analyzer.** *Bmc Genomics* 2016, **17**.
- 899 23. Rodriguez-Campos S, Schurch AC, Dale J, Lohan AJ, Cunha MV, Botelho A,  
900 De Cruz K, Boschioli ML, Boniotti MB, Pacciarini M, et al: **European 2-A**  
901 **clonal complex of *Mycobacterium bovis* dominant in the Iberian**  
902 **Peninsula.** *Infection Genetics and Evolution* 2012, **12**:866-872.
- 903 24. Smith NH, Berg S, Dale J, Allen A, Rodriguez S, Romero B, Matos F,  
904 Ghebremichael S, Karoui C, Donati C, et al: **European 1: A globally important**  
905 **clonal complex of *Mycobacterium bovis*.** *Infection Genetics and Evolution*  
906 2011, **11**:1340-1351.
- 907 25. Muller B, Hilty M, Berg S, Garcia-Pelayo MC, Dale J, Boschioli ML, Cadmus  
908 S, Ngandolo BNR, Godreuil S, Diguimbaye-Djaibe C, et al: **African 1, an**

- 909           **Epidemiologically Important Clonal Complex of *Mycobacterium bovis***  
910           **Dominant in Mali, Nigeria, Cameroon, and Chad.** *Journal of Bacteriology*  
911           2009, **191**:1951-1960.
- 912 26. Berg S, Garcia-Pelayo MC, Muller B, Hailu E, Asiimwe B, Kremer K, Dale J,  
913 Boniotti MB, Rodriguez S, Hilty M, et al: **African 2, a Clonal Complex of**  
914 ***Mycobacterium bovis* Epidemiologically Important in East Africa.** *Journal*  
915 *of Bacteriology* 2011, **193**:670-678.
- 916 27. Loiseau C, Menardo F, Aseffa A, Hailu E, Gumi B, Ameni G, Berg S, Rigouts L,  
917 Robbe-Austerman S, Zinsstag J, et al: **An African origin for *Mycobacterium***  
918 ***bovis*.** *Evolution Medicine and Public Health* 2020:49-59.
- 919 28. Li H, Durbin R: **Fast and accurate short read alignment with Burrows-**  
920 **Wheeler transform.** *Bioinformatics* 2009, **25**:1754-1760.
- 921 29. Harris SR, Feil EJ, Holden MT, Quail MA, Nickerson EK, Chantratita N, Gardete  
922 S, Tavares A, Day N, Lindsay JA, et al: **Evolution of MRSA during hospital**  
923 **transmission and intercontinental spread.** *Science* 2010, **327**:469-474.
- 924 30. Price-Carter M, Brauning R, de Lisle GW, Livingstone P, Neill M, Sinclair J,  
925 Paterson B, Atkinson G, Knowles G, Crews K, et al: **Whole Genome**  
926 **Sequencing for Determining the Source of *Mycobacterium bovis***  
927 **Infections in Livestock Herds and Wildlife in New Zealand.** *Frontiers in*  
928 *Veterinary Science* 2018, **5**.
- 929 31. Page AJ, Taylor B, Delaney AJ, Soares J, Seemann T, Keane JA, Harris SR:  
930 **SNP-sites: rapid efficient extraction of SNPs from multi-FASTA**  
931 **alignments.** *Microb Genom* 2016, **2**:e000056.
- 932 32. Nguyen LT, Schmidt HA, von Haeseler A, Minh BQ: **IQ-TREE: a fast and**  
933 **effective stochastic algorithm for estimating maximum-likelihood**  
934 **phylogenies.** *Mol Biol Evol* 2015, **32**:268-274.
- 935 33. Orloski K, Robbe-Austerman S, Stuber T, Hench B, Schoenbaum M: **Whole**  
936 **Genome Sequencing of *Mycobacterium bovis* Isolated From Livestock in**  
937 **the United States, 1989-2018.** *Frontiers in Veterinary Science* 2018, **5**.
- 938 34. Crispell J, Zadoks RN, Harris SR, Paterson B, Collins DM, de-Lisle GW,  
939 Livingstone P, Neill MA, Biek R, Lycett SJ, et al: **Using whole genome**

- 940            **sequencing to investigate transmission in a multi-host system: bovine**  
941            **tuberculosis in New Zealand.** *Bmc Genomics* 2017, **18**.
- 942    35.    Perea Razo CA, Rodriguez Hernandez E, Ponce SIR, Milian Suazo F, Robbe-  
943            Austerman S, Stuber T, Canto Alarcon GJ: **Molecular epidemiology of cattle**  
944            **tuberculosis in Mexico through whole-genome sequencing and**  
945            **spoligotyping.** *PLoS One* 2018, **13**:e0201981.
- 946    36.    Sandoval-Azuara SE, Muniz-Salazar R, Perea-Jacobo R, Robbe-Austerman S,  
947            Perera-Ortiz A, Lopez-Valencia G, Bravo DM, Sanchez-Flores A, Miranda-  
948            Guzman D, Flores-Lopez CA, et al: **Whole genome sequencing of**  
949            ***Mycobacterium bovis* to obtain molecular fingerprints in human and cattle**  
950            **isolates from Baja California, Mexico.** *Int J Infect Dis* 2017, **63**:48-56.
- 951    37.    Salvador LCM, O'Brien DJ, Cosgrove MK, Stuber TP, Schooley AM, Crispell  
952            J, Church SV, Grohn YT, Robbe-Austerman S, Kao RR: **Disease management**  
953            **at the wildlife-livestock interface: Using whole-genome sequencing to**  
954            **study the role of elk in *Mycobacterium bovis* transmission in Michigan,**  
955            **USA.** *Mol Ecol* 2019, **28**:2192-2205.
- 956    38.    Trewby H, Wright D, Breadon EL, Lycett SJ, Mallon TR, McCormick C,  
957            Johnson P, Orton RJ, Allen AR, Galbraith J, et al: **Use of bacterial whole-**  
958            **genome sequencing to investigate local persistence and spread in bovine**  
959            **tuberculosis.** *Epidemics* 2016, **14**:26-35.
- 960    39.    Glaser L, Carstensen M, Shaw S, Robbe-Austerman S, Wunschmann A, Grear  
961            D, Stuber T, Thomsen B: **Descriptive Epidemiology and Whole Genome**  
962            **Sequencing Analysis for an Outbreak of Bovine Tuberculosis in Beef**  
963            **Cattle and White-Tailed Deer in Northwestern Minnesota.** *PLoS One* 2016,  
964            **11**:e0145735.
- 965    40.    Crispell J, Cassidy S, Kenny K, McGrath G, Warde S, Cameron H, Rossi G,  
966            MacWhite T, White PCL, Lycett S, et al: ***Mycobacterium bovis* genomics**  
967            **reveals transmission of infection between cattle and deer in Ireland.**  
968            *Microb Genom* 2020, **6**.
- 969    41.    Lasserre M, Fresia P, Greif G, Iraola G, Castro-Ramos M, Juambeltz A, Nunez  
970            A, Naya H, Robello C, Berna L: **Whole genome sequencing of the**

- 971            **monomorphic pathogen *Mycobacterium bovis* reveals local**  
972            **differentiation of cattle clinical isolates.** *BMC Genomics* 2018, **19**:2.
- 973    42.    Hauer A, Michelet L, Cochard T, Branger M, Nunez J, Boschirolil ML, Biet F:  
974            **Accurate Phylogenetic Relationships Among *Mycobacterium bovis***  
975            **Strains Circulating in France Based on Whole Genome Sequencing and**  
976            **Single Nucleotide Polymorphism Analysis.** *Frontiers in Microbiology* 2019,  
977            **10**.
- 978    43.    Andrievskaia O, Duceppe MO, Lloyd D: **Genome Sequences of Five**  
979            ***Mycobacterium bovis* Strains Isolated from Farmed Animals and Wildlife**  
980            **in Canada.** *Genome Announc* 2018, **6**.
- 981    44.    Dippenaar A, Parsons SDC, Miller MA, Hlokwe T, Gey van Pittius NC, Adroub  
982            SA, Abdallah AM, Pain A, Warren RM, Michel AL, van Helden PD: **Progenitor**  
983            **strain introduction of *Mycobacterium bovis* at the wildlife-livestock**  
984            **interface can lead to clonal expansion of the disease in a single**  
985            **ecosystem.** *Infect Genet Evol* 2017, **51**:235-238.
- 986    45.    Acosta F, Chernyaeva E, Mendoza L, Sambrano D, Correa R, Rotkevich M,  
987            Tarte M, Hernandez H, Velazco B, de Escobar C, et al: ***Mycobacterium bovis***  
988            **in Panama, 2013.** *Emerg Infect Dis* 2015, **21**.
- 989    46.    Meiring C, Higgitt R, Dippenaar A, Roos E, Buss P, Hewlett J, Cooper D,  
990            Rogers P, de Klerk-Lorist LM, van Schalkwyk L, et al: **Characterizing**  
991            **epidemiological and genotypic features of *Mycobacterium bovis* infection**  
992            **in wild dogs (*Lycaon pictus*).** *Transboundary and Emerging Diseases* 2020.
- 993    47.    Kohl TA, Kranzer K, Andres S, Wirth T, Niemann S, Moser I: **Population**  
994            **Structure of *Mycobacterium bovis* in Germany: a Long-Term Study Using**  
995            **Whole-Genome Sequencing Combined with Conventional Molecular**  
996            **Typing Methods.** *J Clin Microbiol* 2020, **58**.
- 997    48.    Bolger AM, Lohse M, Usadel B: **Trimmomatic: a flexible trimmer for Illumina**  
998            **sequence data.** *Bioinformatics* 2014, **30**:2114-2120.
- 999    49.    Csardi G, Nepusz, T: **The igraph software package for complex network**  
1000            **research.** *InterJournal, Complex Systems* 2006.
- 1001    50.    Xu Y, Cancino-Munoz I, Torres-Puente M, Villamayor LM, Borrás R, Borrás-  
1002            Manéz M, Bosque M, Camarena JJ, Colomer-Roig E, Colomina J, et al: **High-**

- 1003            **resolution mapping of tuberculosis transmission: Whole genome**  
1004            **sequencing and phylogenetic modelling of a cohort from Valencia Region,**  
1005            **Spain.** *PLoS Med* 2019, **16**:e1002961.
- 1006    51.    Revell LJ: **phytools: an R package for phylogenetic comparative biology**  
1007            **(and other things).** *Methods in Ecology and Evolution* 2012, **3**:217-223.
- 1008    52.    Drummond AJ, Suchard MA, Xie D, Rambaut A: **Bayesian Phylogenetics with**  
1009            **BEAUti and the BEAST 1.7.** *Molecular Biology and Evolution* 2012, **29**:1969-  
1010            1973.
- 1011    53.    Baele G, Lemey P, Bedford T, Rambaut A, Suchard MA, Alekseyenko AV:  
1012            **Improving the Accuracy of Demographic and Molecular Clock Model**  
1013            **Comparison While Accommodating Phylogenetic Uncertainty.** *Molecular*  
1014            *Biology and Evolution* 2012, **29**:2157-2167.
- 1015    54.    Baele G, Li WLS, Drummond AJ, Suchard MA, Lemey P: **Accurate Model**  
1016            **Selection of Relaxed Molecular Clocks in Bayesian Phylogenetics.**  
1017            *Molecular Biology and Evolution* 2013, **30**:239-243.
- 1018    55.    Kass RE, Raftery AE: **Bayes Factors.** *Journal of the American Statistical*  
1019            *Association* 1995, **90**:773-795.
- 1020    56.    Rieux A, Khatchikian CE: **TIPDATINGBEAST: an R package to assist the**  
1021            **implementation of phylogenetic tip-dating tests using BEAST.** *Molecular*  
1022            *Ecology Resources* 2017, **17**:608-613.
- 1023    57.    Didelot X, Fraser C, Gardy J, Colijn C: **Genomic Infectious Disease**  
1024            **Epidemiology in Partially Sampled and Ongoing Outbreaks.** *Molecular*  
1025            *Biology and Evolution* 2017, **34**:997-1007.
- 1026    58.    Plummer M, Best N, Cowles K, Vines K: **CODA: convergence diagnosis and**  
1027            **output analysis for MCMC.** *R news* 2006, **6**:7-11.
- 1028    59.    Bouckaert R, Vaughan TG, Barido-Sottani J, Duchene S, Fourment M,  
1029            Gavryushkina A, Heled J, Jones G, Kuhnert D, De Maio N, et al: **BEAST 2.5:**  
1030            **An advanced software platform for Bayesian evolutionary analysis.** *Plos*  
1031            *Computational Biology* 2019, **15**.
- 1032    60.    De Maio N, Wu CH, O'Reilly KM, Wilson D: **New Routes to Phylogeography:**  
1033            **A Bayesian Structured Coalescent Approximation.** *Plos Genetics* 2015, **11**.

- 1034 61. Pupko T, Pe'er I, Shamir R, Graur D: **A fast algorithm for joint reconstruction**  
1035 **of ancestral amino acid sequences.** *Mol Biol Evol* 2000, **17**:890-896.
- 1036 62. Yu GC, Smith DK, Zhu HC, Guan Y, Lam TTY: **GGTREE: an R package for**  
1037 **visualization and annotation of phylogenetic trees with their covariates**  
1038 **and other associated data.** *Methods in Ecology and Evolution* 2017, **8**:28-36.
- 1039 63. Wang LG, Lam TT, Xu S, Dai Z, Zhou L, Feng T, Guo P, Dunn CW, Jones BR,  
1040 Bradley T, et al: **Treeio: An R Package for Phylogenetic Tree Input and**  
1041 **Output with Richly Annotated and Associated Data.** *Mol Biol Evol* 2020,  
1042 **37**:599-603.
- 1043 64. **Geosphere: spherical trigonometry**
- 1044 65. Becker R, Wilks, A.R.: **Maps in S.** *AT&T Bell Laboratories Statistics Research*  
1045 *Report* 1993, **93**.
- 1046 66. Smith NH, Gordon SV, de la Rua-Domenech R, Clifton-Hadley RS, Hewinson  
1047 RG: **Bottlenecks and broomsticks: the molecular evolution of**  
1048 ***Mycobacterium bovis*.** *Nature Reviews Microbiology* 2006, **4**:670-681.
- 1049 67. Coll F, McNerney R, Guerra-Assuncao JA, Glynn JR, Perdigao J, Viveiros M,  
1050 Portugal I, Pain A, Martin N, Clark TG: **A robust SNP barcode for typing**  
1051 ***Mycobacterium tuberculosis* complex strains.** *Nature Communications*  
1052 2014, **5**.
- 1053 68. Korber B, Muldoon M, Theiler J, Gao F, Gupta R, Lapedes A, Hahn BH,  
1054 Wolinsky S, Bhattacharya T: **Timing the ancestor of the HIV-1 pandemic**  
1055 **strains.** *Science* 2000, **288**:1789-1796.
- 1056 69. Ramsden C, Melo FL, Figueiredo LM, Holmes EC, Zanotto PM, Consortium V:  
1057 **High rates of molecular evolution in hantaviruses.** *Mol Biol Evol* 2008,  
1058 **25**:1488-1492.
- 1059 70. Rambaut A, Lam TT, Max Carvalho L, Pybus OG: **Exploring the temporal**  
1060 **structure of heterochronous sequences using TempEst (formerly Path-O-**  
1061 **Gen).** *Virus Evol* 2016, **2**:vew007.
- 1062 71. Menardo F, Duchene S, Brites D, Gagneux S: **The molecular clock of**  
1063 ***Mycobacterium tuberculosis*.** *PLoS Pathog* 2019, **15**:e1008067.
- 1064 72. **Zoonotic Tuberculosis in Mammals , including Bovine and Caprine**  
1065 **Tuberculosis Infections.** In.; 2019



- 1066 73. Williams JE: **The tuberculin test in cattle.** *J Lancet* 1959, **79**:212-213.
- 1067 74. Conlan AJ, McKinley TJ, Karolemeas K, Pollock EB, Goodchild AV, Mitchell  
1068 AP, Birch CP, Clifton-Hadley RS, Wood JL: **Estimating the hidden burden of**  
1069 **bovine tuberculosis in Great Britain.** *PLoS Comput Biol* 2012, **8**:e1002730.
- 1070 75. Conlan AJK, Pollock EB, McKinley TJ, Mitchell AP, Jones GJ, Vordermeier M,  
1071 Wood JLN: **Potential Benefits of Cattle Vaccination as a Supplementary**  
1072 **Control for Bovine Tuberculosis.** *Plos Computational Biology* 2015, **11**.
- 1073 76. Woodroffe R, Donnelly CA, Ham C, Jackson SYB, Moyes K, Chapman K,  
1074 Stratton NG, Cartwright SJ: **Badgers prefer cattle pasture but avoid cattle:**  
1075 **implications for bovine tuberculosis control.** *Ecology Letters* 2016,  
1076 **19**:1201-1208.
- 1077 77. Karolemeas K, McKinley TJ, Clifton-Hadley RS, Goodchild AV, Mitchell A,  
1078 Johnston WT, Conlan AJ, Donnelly CA, Wood JL: **Recurrence of bovine**  
1079 **tuberculosis breakdowns in Great Britain: risk factors and prediction.** *Prev*  
1080 *Vet Med* 2011, **102**:22-29.
- 1081 78. Brooks-Pollock E, Roberts GO, Keeling MJ: **A dynamic model of bovine**  
1082 **tuberculosis spread and control in Great Britain.** *Nature* 2014, **511**:228-231.
- 1083 79. Mekonnen GA, Ameni G, Wood JLN, Berg S, Conlan AJK, Aseffa A, Mihret A,  
1084 Tessema B, Belachew B, Fekadu EW, et al: **Network analysis of dairy cattle**  
1085 **movement and associations with bovine tuberculosis spread and control**  
1086 **in emerging dairy belts of Ethiopia.** *Bmc Veterinary Research* 2019, **15**.

1087

1088

1089

1090

1091

1092

1093

1094

1095 **Supplementary Tables and Figures**

1096

1097 Supplementary Table 1: Model performance based on Maximum Likelihood Estimates (MLE)

1098 and Bayes Factors for all transmission clusters

| <b>Transmission cluster</b> | <b>Model</b>           | <b>log MLE</b>  | <b>log Bayes Factor</b> | <b>Strength of Evidence (Kass &amp; Raftery, 1995)</b> |
|-----------------------------|------------------------|-----------------|-------------------------|--------------------------------------------------------|
| <b>Cluster 1</b>            | Relaxed exponential    | -5536634        | 0.056                   | Not worth more than a bare mention                     |
|                             | Relaxed constant       | -5536655        | 21.289                  | Very strong                                            |
|                             | Strict exponential     | -5536634        | -                       | -                                                      |
|                             | <b>Strict constant</b> | <b>-5536659</b> | <b>25.277</b>           | <b>Very strong</b>                                     |
| <b>Cluster 2</b>            | Relaxed exponential    | -5534141        | -                       | -                                                      |
|                             | Relaxed constant       | -5534156        | 14.906                  | Very strong                                            |
|                             | Strict exponential     | -5534146        | 4.800                   | Strong                                                 |
|                             | <b>Strict constant</b> | <b>-5534161</b> | <b>19.609</b>           | <b>Very strong</b>                                     |
| <b>Cluster 3</b>            | Relaxed exponential    | -5535466        | -                       | -                                                      |
|                             | Relaxed constant       | -5535498        | 31.000                  | Very strong                                            |



|                  |                        |                 |               |                                    |
|------------------|------------------------|-----------------|---------------|------------------------------------|
|                  | Strict exponential     | -5535468        | 2.014         | Positive                           |
|                  | <b>Strict constant</b> | <b>-5535505</b> | <b>39.717</b> | <b>Very strong</b>                 |
| <b>Cluster 4</b> | Relaxed exponential    | -5534382        | 0.101         | Not worth more than a bare mention |
|                  | Relaxed constant       | -5534394        | 12.002        | Very strong                        |
|                  | Strict exponential     | -5534382        | -             | -                                  |
|                  | <b>Strict constant</b> | <b>-5534396</b> | <b>13.793</b> | <b>Very strong</b>                 |
| <b>Cluster 5</b> | Relaxed exponential    | -5534469        | -             | -                                  |
|                  | Relaxed constant       | -5534474        | 4.936         | Strong                             |
|                  | Strict exponential     | -5534470        | 1.661         | Positive                           |
|                  | <b>Strict constant</b> | <b>-5534476</b> | <b>7.052</b>  | <b>Very strong</b>                 |
| <b>Cluster 6</b> | Relaxed exponential    | -5535426        | -             | -                                  |
|                  | Relaxed constant       | -5535452        | 25.594        | Very strong                        |
|                  | Strict exponential     | -5535428        | 2.099         | Positive                           |
|                  | <b>Strict constant</b> | <b>-5535453</b> | <b>27.358</b> | <b>Very strong</b>                 |
| <b>Cluster 7</b> | Relaxed exponential    | -5533415        | -             | -                                  |

|                   |                        |                 |               |                                    |
|-------------------|------------------------|-----------------|---------------|------------------------------------|
|                   | Relaxed constant       | -5533417        | 2.257         | Positive                           |
|                   | Strict exponential     | -5533421        | 5.893         | Very strong                        |
|                   | <b>Strict constant</b> | <b>-5533421</b> | <b>6.083</b>  | <b>Very strong</b>                 |
| <b>Cluster 8</b>  | Relaxed exponential    | -5535839        | -             | -                                  |
|                   | Relaxed constant       | -5535863        | 23.890        | Very strong                        |
|                   | Strict exponential     | -5535841        | 2.074         | Positive                           |
|                   | <b>Strict constant</b> | <b>-5535866</b> | <b>26.912</b> | <b>Very strong</b>                 |
| <b>Cluster 9</b>  | Relaxed exponential    | -5538088        | -             | -                                  |
|                   | Relaxed constant       | -5538147        | 59.427        | Very strong                        |
|                   | Strict exponential     | -5538088        | 0.389         | Not worth more than a bare mention |
|                   | <b>Strict constant</b> | <b>-5538157</b> | <b>69.010</b> | <b>Very strong</b>                 |
| <b>Cluster 10</b> | Relaxed exponential    | -5534887        | -             | -                                  |
|                   | Relaxed constant       | -5534891        | 3.526         | Strong                             |
|                   | Strict exponential     | -5534888        | 0.799         | Not worth more than a bare mention |

|                   |                           |                 |              |                                    |
|-------------------|---------------------------|-----------------|--------------|------------------------------------|
|                   | <b>Strict constant</b>    | <b>-5534894</b> | <b>7.076</b> | <b>Very strong</b>                 |
| <b>Cluster 11</b> | Relaxed exponential       | -5533358        | 1.383        | Positive                           |
|                   | Relaxed constant          | -5533358        | 0.961        | Not worth more than a bare mention |
|                   | Strict exponential        | -5533357        | -            | -                                  |
|                   | <b>Strict constant</b>    | <b>-5533361</b> | <b>3.610</b> | <b>Strong</b>                      |
| <b>Cluster 12</b> | Relaxed exponential       | -5533082        | 1.546        | Positive                           |
|                   | Relaxed constant          | -5533081        | -            | -                                  |
|                   | <b>Strict exponential</b> | <b>-5533085</b> | <b>4.393</b> | <b>Strong</b>                      |
|                   | Strict constant           | -5533083        | 2.369        | Positive                           |

1099

1100

1101 Supplementary Table 2: Effective Sample Size (ESS) for TransPhylo parameters.

| <b>Transmission cluster</b> | <b>Sampling proportion pi</b> | <b>Within-host coalescent rate Ne*</b> | <b>Basic reproduction R</b> |
|-----------------------------|-------------------------------|----------------------------------------|-----------------------------|
| <b>Cluster 1</b>            | 1721                          | 367                                    | 2407                        |
| <b>Cluster 2</b>            | 6027                          | 1119                                   | 3400                        |
| <b>Cluster 3</b>            | 1890                          | 391                                    | 3196                        |
| <b>Cluster 4</b>            | 4761                          | 581                                    | 2649                        |
| <b>Cluster 5</b>            | 108783                        | 933                                    | 10035                       |
| <b>Cluster 6</b>            | 2477                          | 322                                    | 4910                        |

|                   |       |      |       |
|-------------------|-------|------|-------|
| <b>Cluster 7</b>  | 86600 | 568  | 3311  |
| <b>Cluster 8</b>  | 3393  | 720  | 13012 |
| <b>Cluster 9</b>  | 10640 | 202  | 17844 |
| <b>Cluster 10</b> | 2620  | 150  | 3533  |
| <b>Cluster 11</b> | 22204 | 1579 | 5094  |
| <b>Cluster 12</b> | 11576 | 8014 | 3128  |

1102

1103 Supplementary Table 3: Substitution rates for each transmission cluster

| <b>Transmission cluster</b> | <b>Median substitution rate (substitutions/site/year)</b> | <b>Median substitution rate (substitutions/genome/year)</b> |
|-----------------------------|-----------------------------------------------------------|-------------------------------------------------------------|
| <b>Cluster 1</b>            | $4.3 \times 10^{-7}$                                      | 1.86                                                        |
| <b>Cluster 2</b>            | $2.1 \times 10^{-7}$                                      | 0.89                                                        |
| <b>Cluster 3</b>            | $1.4 \times 10^{-6}$                                      | 6.00                                                        |
| <b>Cluster 4</b>            | $8.8 \times 10^{-7}$                                      | 3.82                                                        |
| <b>Cluster 5</b>            | $3.5 \times 10^{-7}$                                      | 1.53                                                        |
| <b>Cluster 6</b>            | $9.1 \times 10^{-7}$                                      | 3.94                                                        |
| <b>Cluster 7</b>            | $1.2 \times 10^{-7}$                                      | 0.52                                                        |
| <b>Cluster 8</b>            | $2.0 \times 10^{-7}$                                      | 0.87                                                        |
| <b>Cluster 9</b>            | $3.2 \times 10^{-7}$                                      | 1.39                                                        |
| <b>Cluster 10</b>           | $2.4 \times 10^{-7}$                                      | 1.04                                                        |
| <b>Cluster 11</b>           | $1.5 \times 10^{-7}$                                      | 0.66                                                        |
| <b>Cluster 12</b>           | $1.2 \times 10^{-7}$                                      | 0.51                                                        |

1104

1105

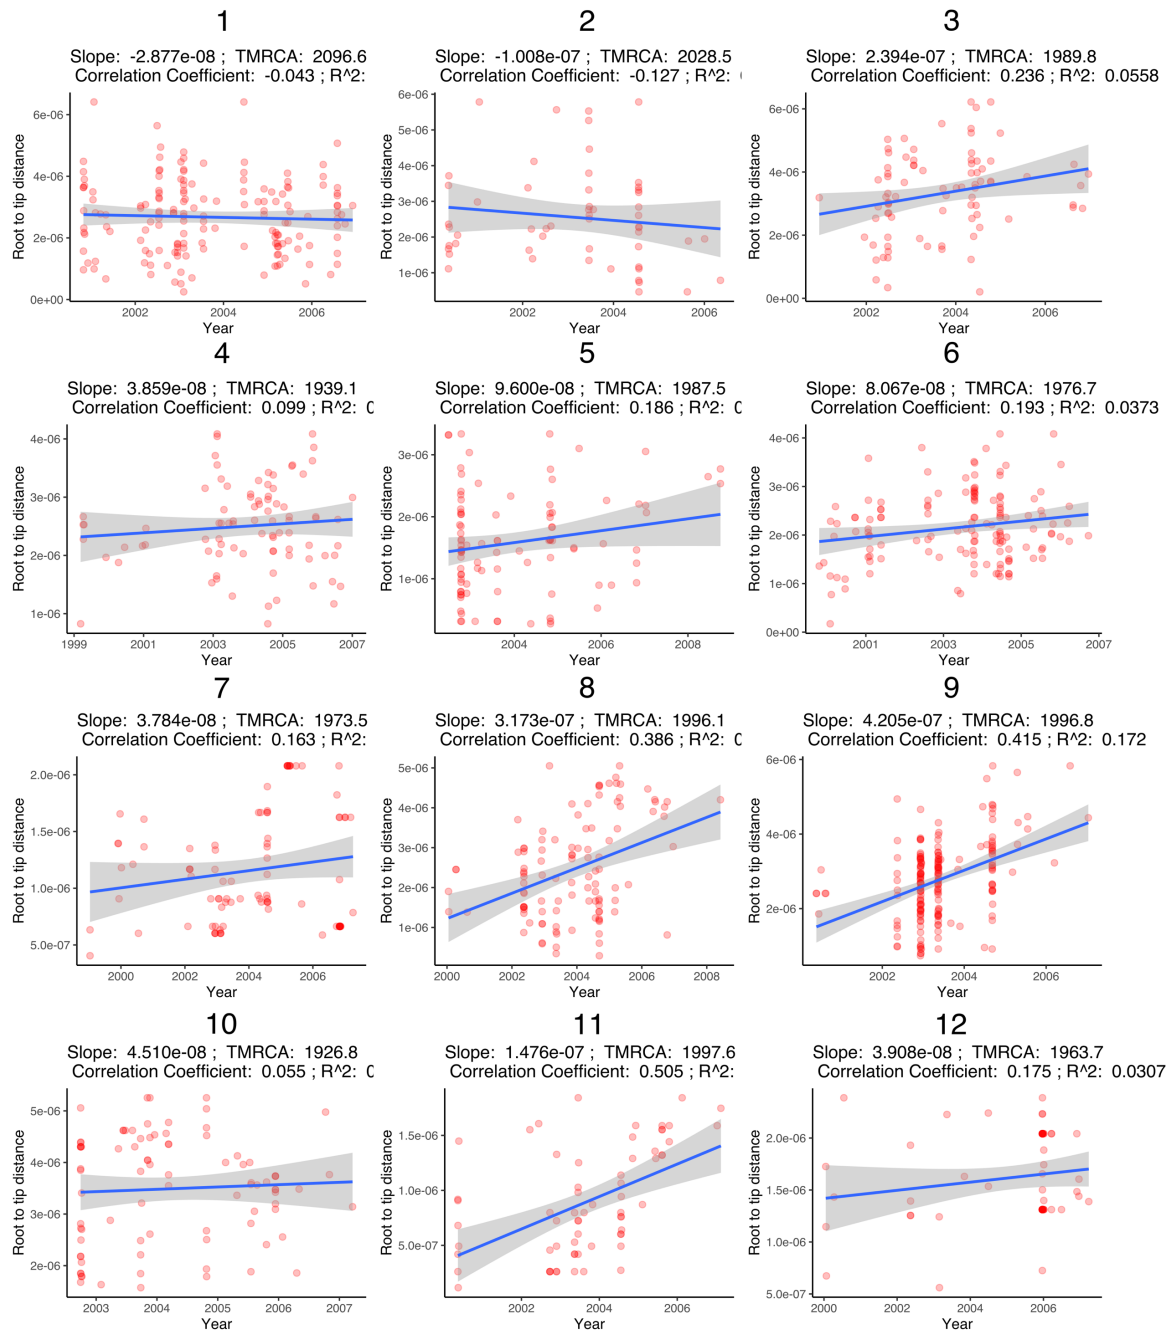

1106

1107 Supplementary Figure 1: Root to tip distances plotted against sampling dates for all isolates

1108 in each transmission cluster.

1109

1110

1111

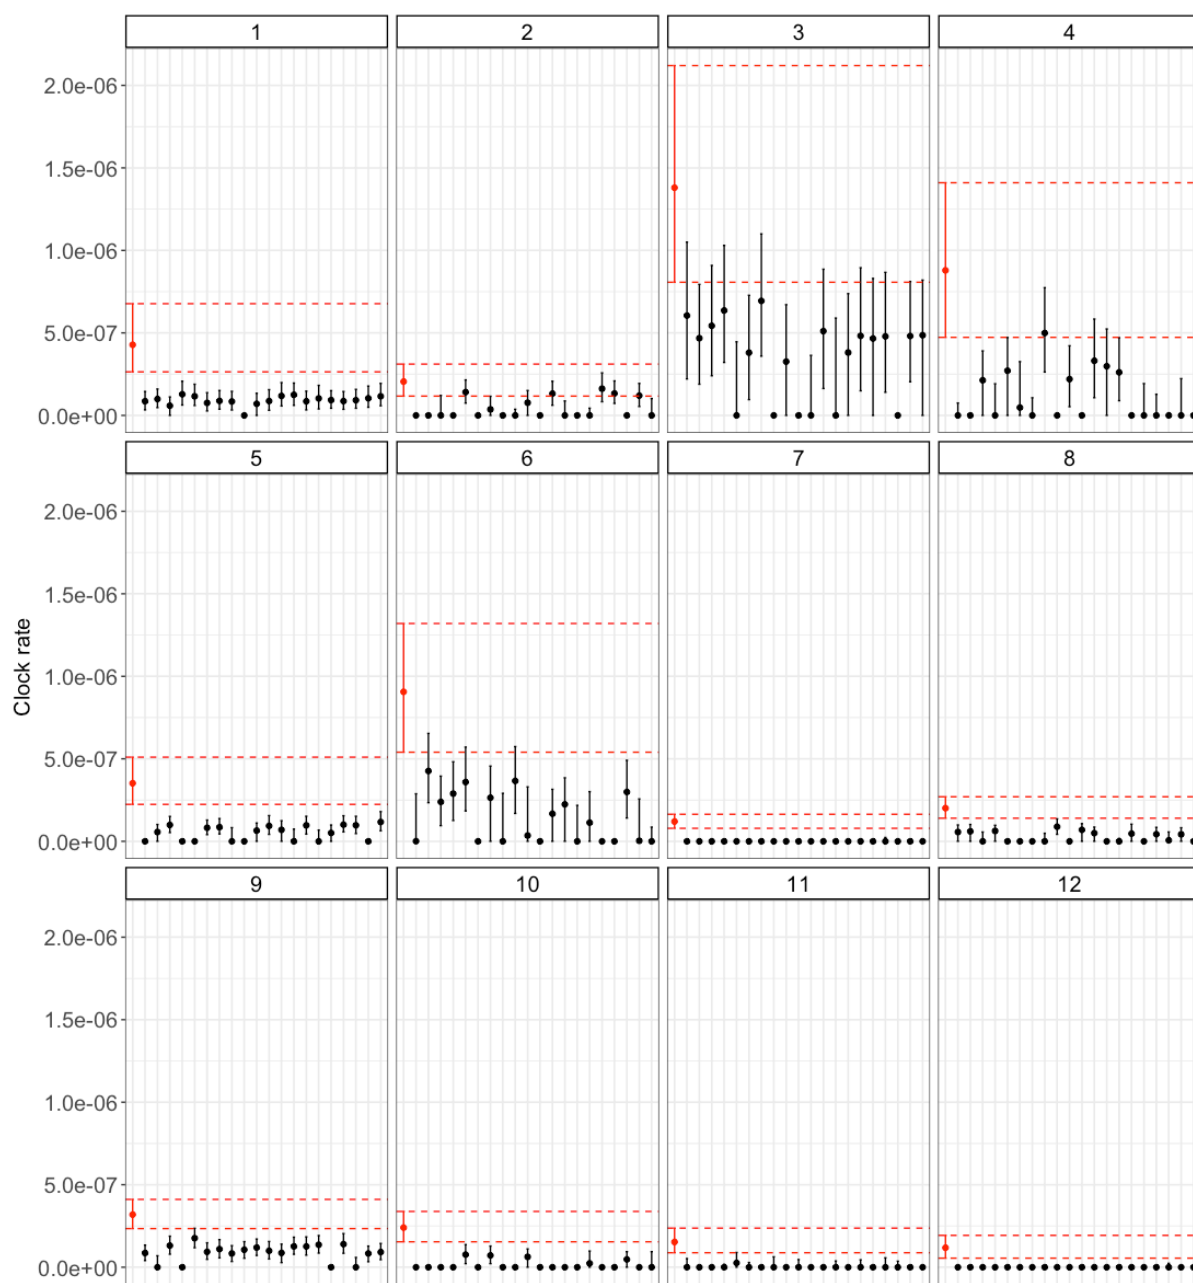

1112

1113

1114 Supplementary Figure 2: Date randomization (DTR) analysis in BEAST for each transmission

1115 cluster. Estimated substitution rates (mean and highest posterior density) shown in red for

1116 the observed dataset and black for the randomized datasets.

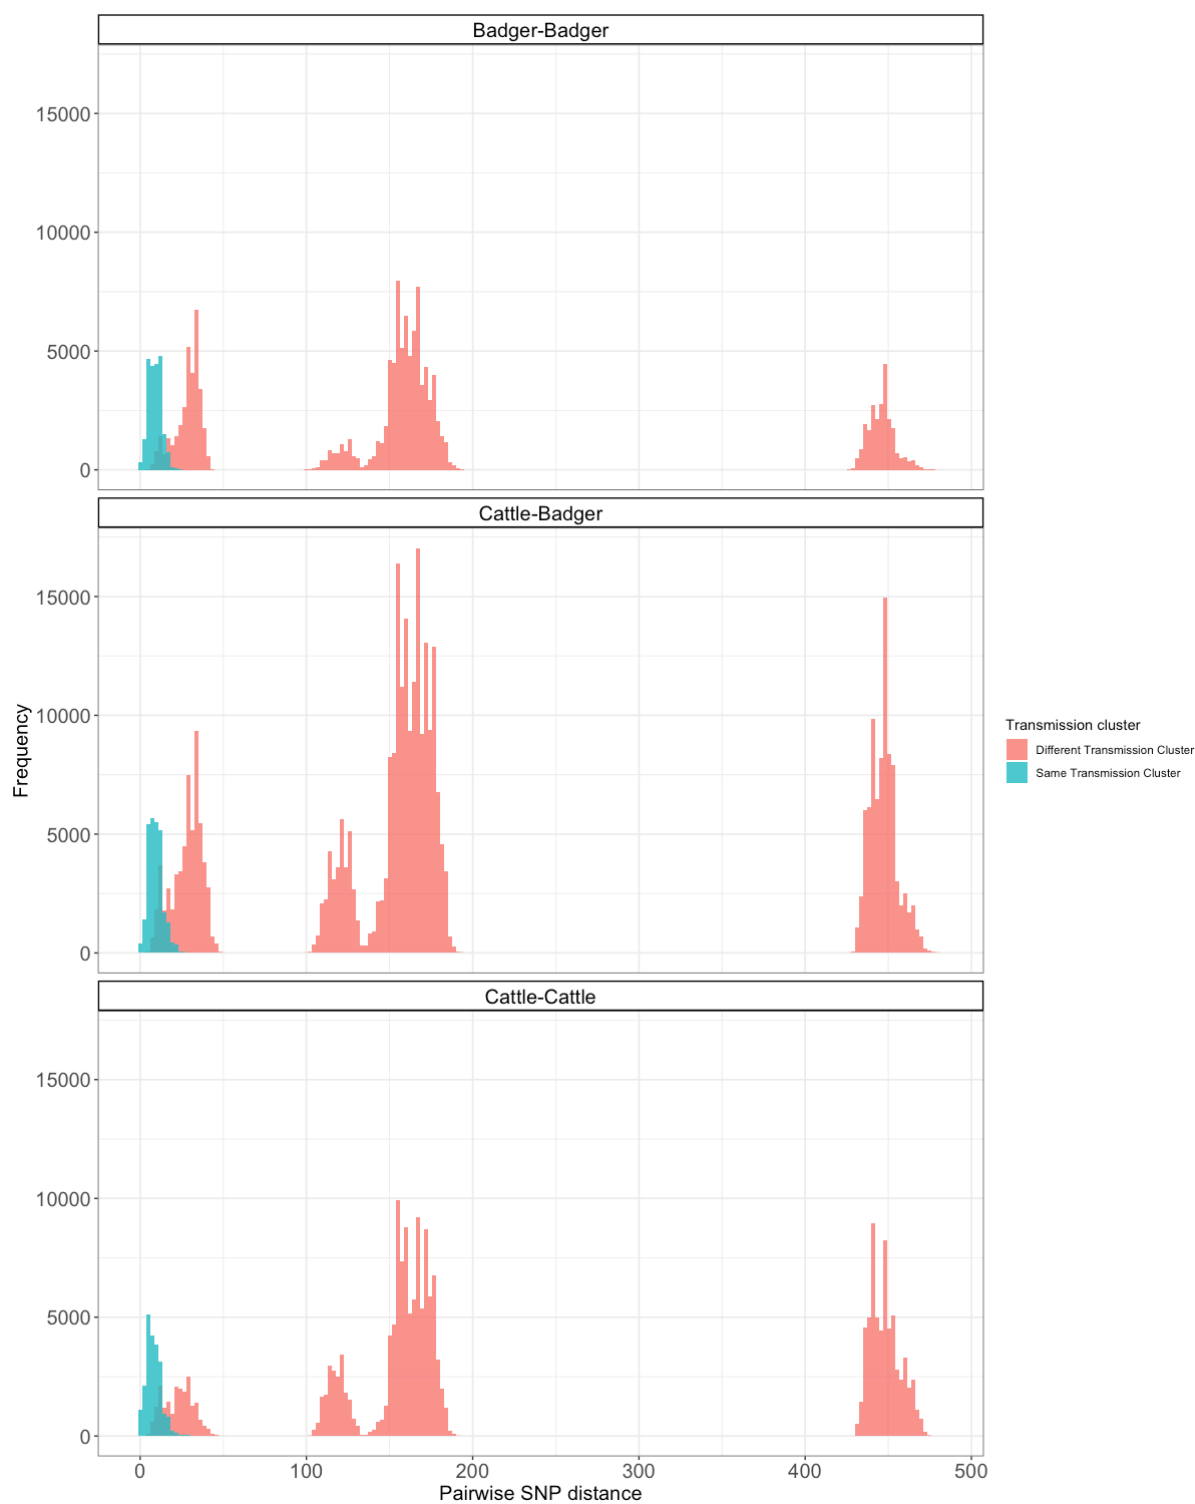

1117

1118 Supplementary Figure 3: Pairwise distance histograms for all samples, coloured by

1119 between/within transmission cluster and separated by host pair.

1120

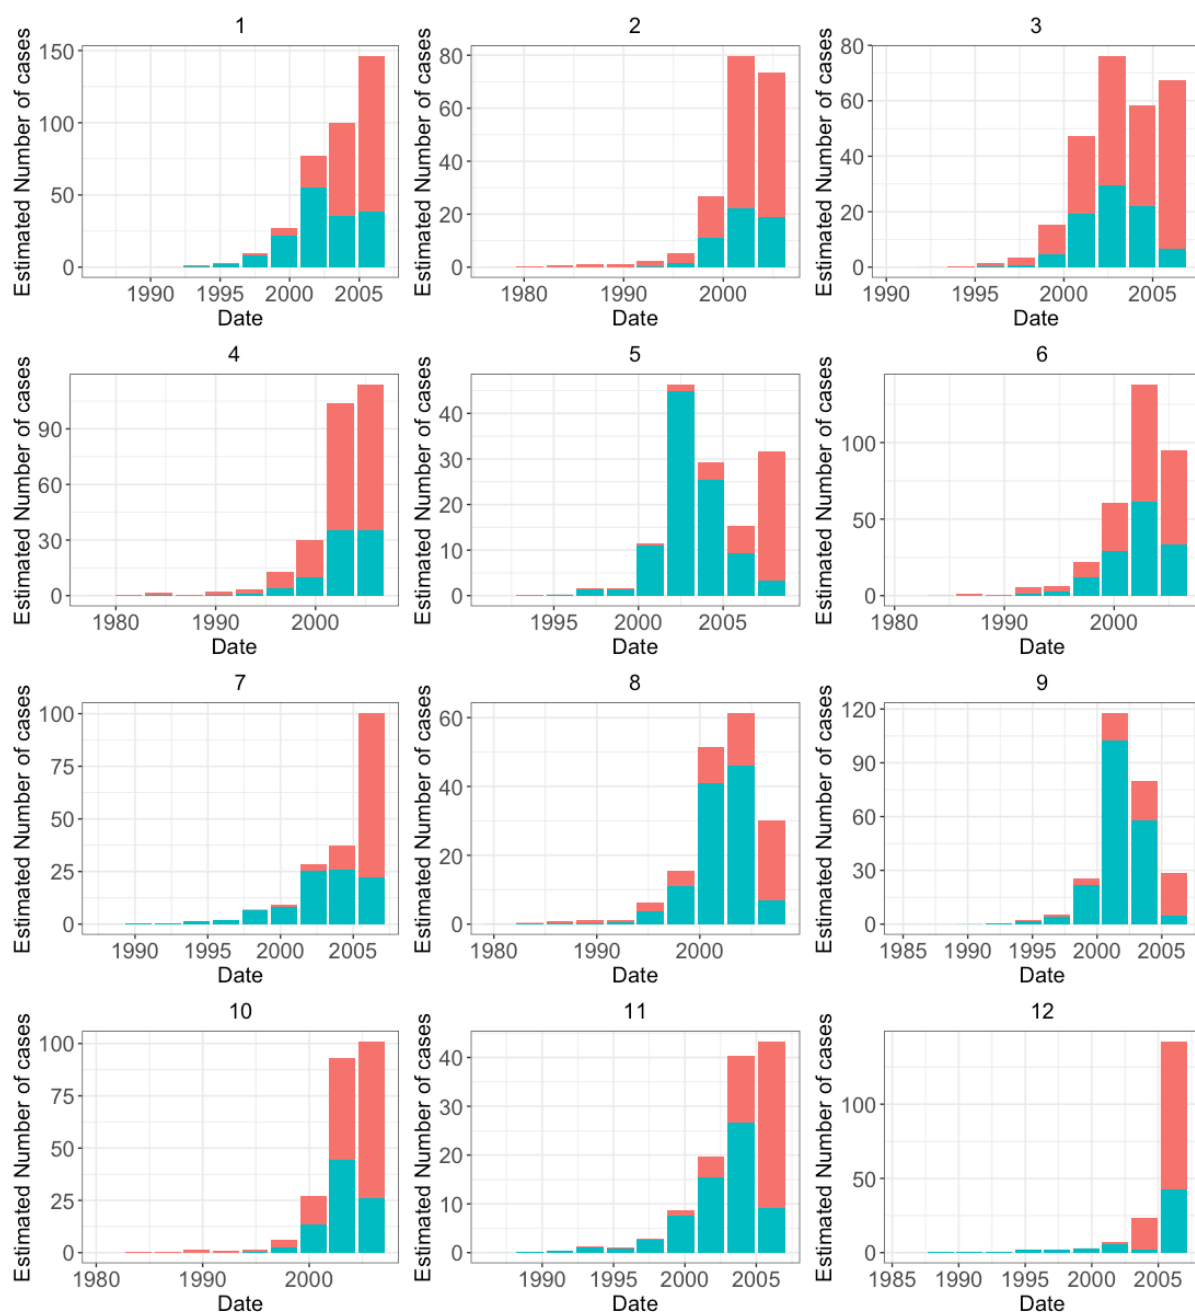

Supplementary Figure 4: Proportion of sampled and estimated unsampled cases for each transmission cluster. Sampled and unsampled cases are shown in red and blue respectively



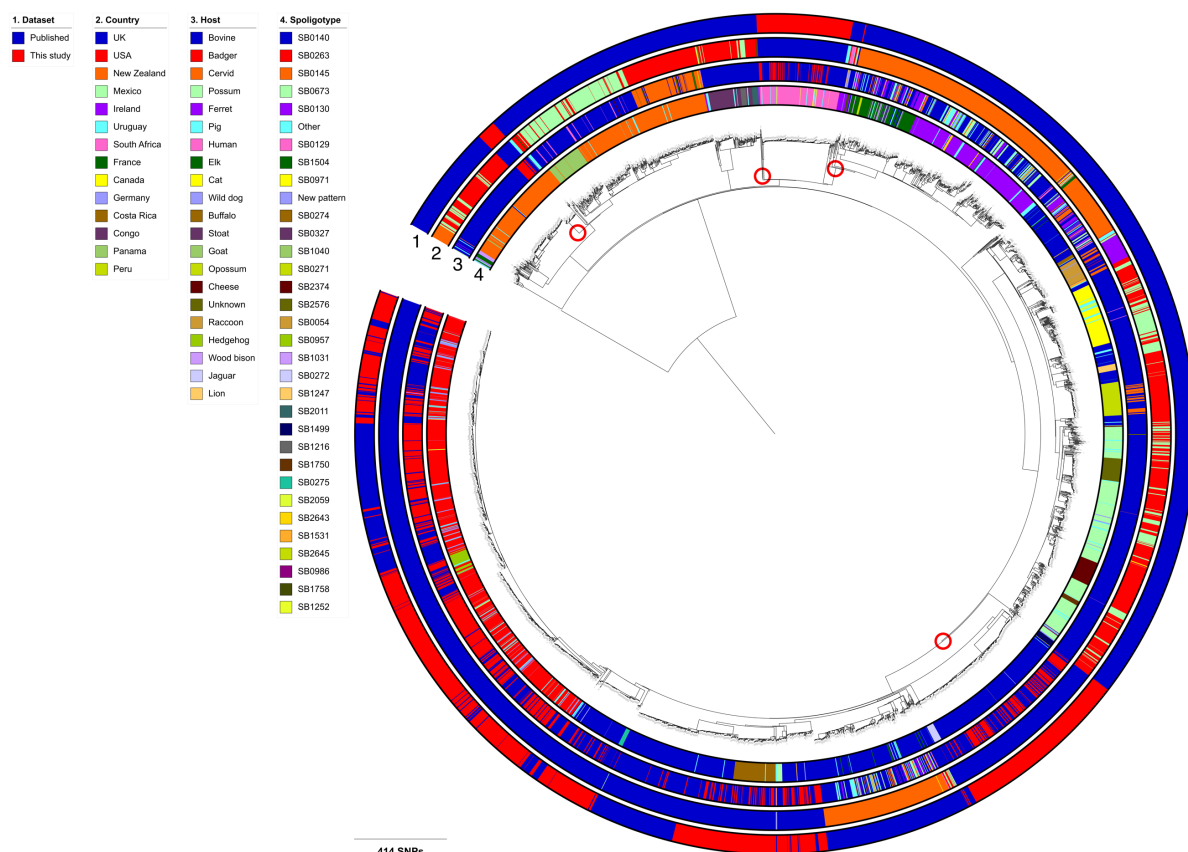

1125

1126

1127 Supplementary Figure 5: Maximum likelihood phylogenetic tree of 4,281 *Mycobacterium*

1128 *bovis* Eu1 isolates rooted with a *M. caprae* isolate as the outgroup. Dataset, country, host

1129 and spoligotype are shown as datastrips around the outside of the phylogenetic tree.

1130 Potential introductions of Eu1 into England are highlighted with red circles.

1131
